# Supplementary material
Source: publisher figshare collection journal article supplement (https://gsajournals.figshare.com/ndownloader/files/30688409)
Supplement: Supplementary file 1 [file 30688409]

## Sheet: Sheet2
Dataset S08. Overlapping between genes commonly expressed by Arabidopsis thaliana after inoculations with Escherichia coli DH5α, Salmonella typhimurium, and Pseudomonas syringae (reported by Schikora et al., 2011) and genes significantly expressed by A. thaliana 4 and 24 hours post inoculation (HPI) with E. coli O157:H7 or S. enterica ser. Typhimurium 14028s (this study).
Common genes expressed 2 HPI with E. coli DH5α, S. typhimurium, and P. syringae (Schikora et al., 2011)	E. coli O157:H7 - 4 HPI (this study)	Overalpping	Schikora's genes common with this study genes (%)	S. enterica 14028s - 4 HPI (this study)	Overalpping	Schikora's genes common with this study genes (%)	E. coli O157:H7 - 24 HPI (this study)	Overalpping	Schikora's genes common with this study genes (%)	S. enterica 14028s - 24 HPI (this study)	Overalpping	Schikora's genes common with this study genes (%)
AT2G38170	AT4G21865	AT1G25400	11.6	AT2G22920	AT1G51800	4.3	AT4G12470	AT2G19190	12.8	AT1G19250	AT2G19190	43.9
AT2G43820	AT5G41460	AT1G51800		AT5G42530	AT2G19190		AT2G25470	AT5G48540		AT5G11210	AT5G48540
AT4G34950	AT1G65390	AT1G55450		AT1G65486	AT2G39200		ATCG00090	AT1G51800		AT5G02780	AT1G51800
AT5G65010	AT5G61440	AT1G65390		AT2G35600	AT1G55450		AT1G76930	AT5G01540		AT1G15520	AT5G01540
AT1G02360	AT5G44565	AT2G19190		AT1G51800	AT4G14365		AT5G44575	AT1G68840		AT2G14610	AT1G68840
AT1G03610	AT4G30650	AT2G37940		AT4G12470	AT2G37940		AT2G19190	AT2G40000		AT1G26410	AT2G40000
AT1G05300	AT1G51850	AT2G38470		AT2G19190	AT1G66880		AT1G21310	AT4G14365		AT5G38250	AT4G14365
AT1G07000	AT4G35320	AT2G38870		AT4G23170			AT5G64120	AT5G48657		AT1G14080	AT5G48657
AT1G07135	AT4G21920	AT2G39200		AT5G24570			AT1G01060	AT2G26560		AT1G51920	AT2G26560
AT1G08050	AT4G12600	AT2G40000		AT1G67330			AT1G09080	AT5G25250		AT5G44990	AT5G25250
AT1G10340	AT2G38870	AT3G22060		AT2G39200			AT2G05380	AT4G11890		AT3G26830	AT4G11890
AT1G14540	AT5G24110	AT3G57550		AT4G23140			AT5G48540	AT2G38470		AT3G13433	AT2G38470
AT1G18300	AT1G25250	AT4G02330		AT2G25510			AT1G51800	AT5G37600		AT3G45330	AT5G37600
AT1G18380	AT3G05890	AT4G14365		AT4G23130			AT3G02380	AT2G24600		AT3G28510	AT2G24600
AT1G19020	AT2G38570	AT4G32480		AT4G00165			AT2G15020	AT4G33050		AT2G13810	AT4G33050
AT1G19530	AT5G44575	AT4G33050		AT1G80650			AT2G46830	AT2G31880		AT4G21840	AT2G31880
AT1G21010	AT2G27775	AT5G37600		AT5G20650			AT4G27450	AT3G57550		AT2G26400	AT3G57550
AT1G25390	AT5G44574	AT5G48540		AT5G58640			AT3G24900	AT1G66880		AT5G19880	AT1G66880
AT1G25400	ATCG00090	AT5G57220		AT2G39900			AT2G43570	AT3G11820		AT1G66600	AT3G11820
AT1G28380	AT5G08000			AT5G04470			AT3G23150	AT2G37940		AT1G71390	AT2G37940
AT1G29690	AT1G04040			AT4G22690			AT2G41250	AT3G15520		AT4G14450	AT3G15520
AT1G30700	AT3G18580			AT5G55620			AT4G35770			AT1G36622
AT1G30720	AT2G41180			AT5G40830			AT3G27170			AT4G15417
AT1G30730	AT1G51800			AT1G33265			AT5G01540			AT3G18250
AT1G30755	AT2G22170			AT1G72600			AT1G64500			AT3G13610
AT1G32928	AT1G65486			AT2G41100			AT1G24145			AT1G79680
AT1G33055	AT4G12470			AT5G57887			AT4G23810			AT2G43000
AT1G33610	AT3G06680			AT3G07230			AT5G15850			AT4G23280
AT1G42990	AT5G24570			AT4G16980			AT4G36990			AT1G51890
AT1G49000	AT1G63220			AT1G55450			AT1G02920			AT2G19190
AT1G51620	AT4G16447			AT5G47610			AT3G04640			AT1G54010
AT1G51700	AT4G32800			AT4G08280			AT3G12320			AT1G03850
AT1G51800	AT4G01700			AT5G20500			AT4G01720			AT2G43570
AT1G52200	AT5G17460			AT1G02920			AT1G73870			AT4G37010
AT1G55450	AT2G33570			AT5G67600			AT1G68840			AT5G47850
AT1G59590	AT4G11060			AT4G33640			AT3G16770			AT3G55700
AT1G61360	AT5G25890			AT3G54680			AT1G65486			AT5G38900
AT1G65230	AT1G27020			AT1G59710			AT1G02930			AT4G11470
AT1G65390	AT1G14980			AT4G23810			AT3G28540			AT1G65690
AT1G65490	AT5G37740			AT2G29580			AT3G04720			AT3G13950
AT1G66090	AT5G67510			AT5G48760			AT4G04490			AT3G15518
AT1G66880	AT1G32920			AT4G09830			AT5G08240			AT5G22530
AT1G68840	AT2G20390			AT4G29410			AT4G23150			AT1G16420
AT1G72060	AT1G25370			AT3G28920			AT1G68440			AT1G74080
AT1G76600	AT1G29670			AT3G06790			AT2G46790			AT1G65500
AT1G77120	AT2G37600			AT1G10960			AT1G53160			AT1G47890
AT1G78850	AT5G44130			AT3G24506			AT2G31380			AT5G24110
AT1G80840	AT2G22122			AT5G16390			AT2G20670			AT1G26420
AT2G01180	AT5G05790			AT1G17860			AT4G00700			AT1G51860
AT2G02220	AT2G45860			AT5G14285			AT3G21780			AT1G74590
AT2G06960	AT1G65032			AT3G49010			AT5G41761			AT1G09080
AT2G13790	AT3G18760			AT1G51360			AT5G24120			AT1G66960
AT2G13800	AT3G54400			AT1G53230			AT1G32900			AT2G29350
AT2G17740	AT4G29410			AT2G45180			AT3G57260			AT1G26380
AT2G18680	AT2G18740			AT3G12260			AT1G33960			AT2G30750
AT2G19190	AT3G05660			AT3G52730			AT4G38560			AT3G07600
AT2G22500	AT1G11475			AT1G31580			AT2G41100			AT1G61800
AT2G24600	AT1G51090			AT3G47670			AT3G27350			AT4G13890
AT2G25735	AT4G39740			AT4G20380			AT3G19030			AT4G28420
AT2G26560	AT5G46690			AT5G05090			AT1G13245			AT1G02930
AT2G28250	AT1G17490			AT3G21350			AT5G27120			AT1G33950
AT2G29870	AT1G64980			AT1G15260			AT3G01290			AT4G35180
AT2G30490	AT5G18080			AT1G72430			AT5G44568			AT3G24900
AT2G31020	AT3G27520			AT4G18205			AT3G13790			AT1G78410
AT2G31880	AT5G48760			AT3G26210			AT5G01880			AT4G11170
AT2G34390	AT5G16160			AT5G56150			AT2G40000			AT2G25470
AT2G35930	AT5G66410			AT2G35635			AT2G24550			AT2G18660
AT2G36220	AT5G05990			AT5G18850			AT5G25260			AT5G52740
AT2G36690	AT3G21540			AT2G19730			AT3G16530			AT3G01830
AT2G37430	AT5G64680			AT5G13440			AT4G23140			AT4G10500
AT2G37710	AT4G23170			AT4G34150			AT2G43150			AT4G00700
AT2G37940	AT2G41100			AT3G25500			AT3G26210			AT2G24850
AT2G38470	AT1G66070			AT2G04360			AT1G25560			AT3G28580
AT2G38870	AT2G24940			AT2G39460			AT4G14365			AT5G12880
AT2G39200	AT3G45230			AT1G01230			AT3G08970			AT5G44575
AT2G39530	AT1G22050			AT1G61790			AT2G17040			AT1G21310
AT2G40000	AT4G24920			AT3G63120			AT5G26920			AT4G02380
AT2G43620	AT4G36500			AT1G80500			AT4G02520			AT1G32960
AT2G44370	AT4G23130			AT5G55610			AT5G48657			AT1G07900
AT2G44380	AT2G35520			AT3G45640			AT2G26560			AT2G25440
AT2G44490	AT3G52730			AT3G51010			AT5G61030			AT5G01560
AT2G45220	AT1G14170			AT2G43350			AT5G46080			AT1G35230
AT3G02550	AT5G37600			AT4G14365			AT4G10500			AT1G65484
AT3G06435	AT3G13230			AT5G55190			AT2G15390			AT3G44326
AT3G07040	AT3G17780			AT5G46330			AT1G14880			AT1G69490
AT3G07390	AT1G22960			AT2G37940			AT1G74360			AT4G04500
AT3G09520	AT3G03010			AT2G21370			AT3G52400			AT1G75040
AT3G10300	AT1G20140			AT1G07360			AT4G27310			AT1G02920
AT3G11820	AT1G72600			AT5G20010			AT2G46270			AT4G04540
AT3G13950	AT5G44780			AT4G17245			AT1G02610			AT5G46050
AT3G15520	AT3G13940			AT2G33580			AT2G25510			AT5G53110
AT3G16150	AT4G01720			AT1G13270			AT4G17245			AT1G44130
AT3G18830	AT3G14390			AT1G75500			AT2G37970			AT2G18690
AT3G21080	AT1G77940			AT4G03520			AT2G37460			AT4G23810
AT3G21630	AT3G22060			AT3G11660			AT4G05070			AT1G21240
AT3G22060	AT1G62790			AT5G22875			AT5G55970			AT4G04510
AT3G23250	AT3G25220			AT3G25220			AT3G51940			AT2G33080
AT3G27220	AT5G12190			AT3G45290			AT1G17147			AT4G23150
AT3G46280	AT3G50970			AT3G02180			AT1G75040			AT1G65845
AT3G47380	AT2G41110			AT1G56330			AT1G80920			AT1G57630
AT3G48650	AT5G57887			AT3G10810			AT2G32680			AT3G15536
AT3G49530	AT2G19680			AT2G03680			AT5G39850			AT1G51800
AT3G50960	AT2G39795			AT5G50840			AT3G14900			AT2G40740
AT3G51920	AT4G14560			AT5G65200			AT4G08290			AT5G67450
AT3G52450	AT1G80650			AT5G44060			AT5G18470			AT4G21850
AT3G55980	AT3G07510			AT3G01560			AT1G15830			AT2G04070
AT3G57550	AT2G19190			AT1G49970			AT4G11280			AT5G01550
AT3G59080	AT5G15220			AT4G25680			AT1G69160			AT4G35380
AT3G59700	AT1G80150			AT1G20100			AT5G06980			AT1G33960
AT3G26500	AT4G24960			AT1G53040			AT1G75100			AT3G22910
AT4G01250	AT5G25170			AT3G47600			ATCG00600			AT3G57260
AT4G02330	AT5G09420			AT1G30630			AT5G27420			AT2G02010
AT4G11890	AT5G55140			AT5G42980			AT4G15530			AT1G15670
AT4G14365	AT1G67330			AT3G05070			AT2G47130			AT3G49340
AT4G20000	AT4G15000			AT4G20480			AT5G25250			AT1G72540
AT4G20860	AT2G30870			AT1G66880			AT2G38860			AT5G01540
AT4G22470	AT3G02570			AT5G54680			AT1G09932			AT5G64810
AT4G23190	AT5G55920			AT3G52990			AT1G80440			AT5G11920
AT4G23800	ATCG00220			AT1G03150			AT1G74710			AT1G14880
AT4G24110	AT3G15356			AT3G26990			AT5G19240			AT5G25260
AT4G25110	AT5G54720			AT4G00860			AT5G28030			AT1G58225
AT4G26200	AT3G26850			AT5G38660			AT4G28510			AT5G39670
AT4G27110	AT5G23510			AT2G19310			AT3G03920			AT4G23310
AT4G32480	AT4G26600			AT4G39200			AT3G55880			AT3G47480
AT4G32870	AT5G57220			AT2G16600			AT5G52750			AT1G67810
AT4G33050	AT3G17390			AT1G76730			AT5G54720			AT5G18470
AT4G33070	AT4G22910			AT1G72020			AT4G11890			AT5G64120
AT4G35110	AT5G42150			AT3G50750			AT2G39210			AT4G23140
AT4G35180	AT3G09540			AT1G13450			AT5G24210			AT4G04490
AT4G38550	AT1G51100			AT3G62580			AT2G37690			AT5G48290
AT4G39640	AT2G15910			AT1G03410			AT3G62600			AT5G64510
AT4G39670	AT1G79390			AT2G44870			AT1G73650			AT4G38560
AT4G39675	AT3G49890			AT1G28670			AT4G25340			AT3G47050
AT5G01540	AT5G43620			AT1G51200			AT1G13260			AT5G24200
AT5G02490	AT4G02790			AT3G52300			AT4G29520			AT3G26500
AT5G06310	AT2G35240			AT3G61460			AT2G29120			AT3G48640
AT5G10040	AT3G43740			AT3G12380			AT5G47560			AT4G39830
AT5G12930	AT1G76160			AT1G73710			AT5G06530			AT1G57560
AT5G13490	AT1G65700			AT3G47890			AT3G25010			AT5G26170
AT5G15120	AT3G16530			AT5G54730			AT1G08450			AT1G19020
AT5G19110	AT1G78820			AT2G21170			AT2G25000			AT5G52760
AT5G20230	AT2G39900			AT4G31040			AT2G41880			AT5G26920
AT5G25250	AT5G52882			AT3G26100			AT5G10380			AT4G18250
AT5G25450	AT3G28340			AT1G68020			AT1G15410			AT3G25010
AT5G26340	AT1G07050			AT1G13120			AT5G58940			AT1G21110
AT5G37600	AT5G58640			AT5G41770			AT1G26250			AT1G73810
AT5G37770	AT3G52470			AT1G74800			AT3G53830			AT5G13320
AT5G39580	AT2G26810			AT4G30720			AT3G50690			AT3G26440
AT5G42830	AT5G18500			AT4G14230			AT4G08230			AT5G47220
AT5G44070	AT3G23810			AT1G31930			AT2G36120			AT4G01870
AT5G45750	AT3G07230			AT5G64250			AT2G02230			AT3G60540
AT5G47720	AT5G38430			AT2G26670			AT5G26860			AT2G27660
AT5G48430	AT3G04920			AT5G08450			AT2G43060			AT5G52390
AT5G48540	AT1G44835			AT3G62010			AT1G52600			AT1G01680
AT5G48657	AT5G48240			AT1G26550			AT1G56120			AT3G60470
AT5G49520	AT5G02130			AT2G24200			AT1G67330			AT5G42830
AT5G50200	AT5G42900			AT1G70290			AT1G78270			AT1G74360
AT5G57220	AT3G01560			AT2G42520			ATCG00290			AT1G74710
AT5G61210	AT3G15640			AT3G17800			AT3G45290			AT3G57460
AT5G62570	AT1G02930			AT4G19600			AT3G50740			AT5G26700
AT5G67450	AT2G18910			AT5G20300			AT1G14370			AT3G59880
AT3E21190	AT5G16130			AT4G23050			AT3G19450			AT4G25070
AT4E25020	AT3G43810			AT3G53920			AT1G69720			AT2G04495
AT5E39460	AT4G29390			AT3G51370			AT4G13830			AT4G18253
	AT1G80640			AT4G24520			AT1G11475			AT4G21903
	AT5G18470			AT5G57610			AT5G22290			AT4G11890
	AT1G80245			AT5G55600			AT1G30900			AT5G64000
	AT1G55450			AT3G18790			AT2G38470			AT1G28370
	AT3G59810			AT2G32480			AT5G37600			AT3G13790
	AT2G17230			AT1G02305			AT3G25717			AT3G57240
	AT1G17665			AT3G09840			AT5G28540			AT4G36990
	AT1G76300			AT1G05890			AT1G71030			AT5G27060
	AT4G00026			AT3G19960			AT5G14640			AT5G26690
	AT5G54980			AT3G48060			AT1G74560			AT2G41380
	AT2G39200			AT5G63320			AT4G03450			AT1G04980
	AT5G08180			AT4G26450			AT2G44670			AT3G08970
	AT1G59710			AT2G42270			AT4G34150			AT1G24145
	AT5G08760			AT3G48050			AT2G15080			AT4G14370
	AT2G35650			AT5G53480			AT5G01820			AT4G37530
	AT5G55620			AT5G20610			AT5G42020			AT3G50930
	AT1G78450			AT3G58110			AT2G28305			AT1G80840
	AT4G00165			AT5G02810			AT5G18130			AT1G34180
	AT3G05710			AT3G04260			AT5G54710			AT4G02520
	AT4G22580			AT3G29760			AT2G24600			AT4G34135
	AT1G60640			AT4G14350			AT1G18570			AT4G39030
	AT1G45688			AT2G24830			AT1G62180			AT5G59820
	AT5G67600			AT3G26380			AT1G22280			AT5G02490
	AT5G45600			AT1G02840			AT1G32700			AT3G47780
	AT5G25110			AT5G04990			AT5G25440			AT5G27420
	AT5G46570			AT3G54010			AT1G66920			AT1G67520
	AT4G11630			AT5G66055			AT5G18600			AT1G13340
	AT5G47060			AT5G23590			AT4G32940			AT1G43910
	AT3G46540			AT1G13350			AT5G67190			AT1G52200
	AT1G80750			AT3G47060			AT5G43850			AT3G51330
	AT5G05000			AT3G62770			AT5G63530			AT2G04450
	AT4G27720			AT5G16760			ATCG00590			AT5G57480
	AT3G53740			AT1G17680			AT5G57660			AT2G47800
	AT1G79150			AT1G52520			AT1G56110			AT3G61190
	AT1G62480			AT4G01610			AT4G29900			AT2G32680
	AT5G10410			AT1G13320			AT2G39400			AT4G23190
	AT3G17910			AT3G08650			AT1G15790			AT3G46090
	AT5G04470			AT5G25060			AT2G02360			AT1G09932
	AT4G39230			AT2G42190			AT4G27010			AT5G09290
	AT2G35860			AT1G19880			AT4G33050			AT2G46400
	AT3G07090			AT4G08480			AT3G10020			AT2G39210
	AT2G44860			AT5G43920			AT5G67340			AT1G76960
	AT3G49870			AT3G54670			AT2G11910			AT2G47130
	AT3G49220			AT4G33740			AT3G11900			AT1G77510
	AT1G33265			AT2G26430			AT2G20390			AT4G02330
	AT4G33640			AT5G26210			AT5G24530			AT5G48657
	AT5G39760			AT2G06530			AT3G24100			AT5G48540
	AT2G47640			AT1G79940			AT3G12340			AT3G13100
	AT3G20000			AT3G12140			AT2G31880			AT4G17500
	AT1G29320			AT3G15090			AT1G56010			AT5G08240
	AT2G40190			AT1G49720			AT4G34135			AT3G60580
	AT4G09890			AT2G02570			AT5G03380			AT4G37370
	AT1G55690			AT1G63360			AT2G29670			AT5G42020
	AT4G01560			AT2G27950			AT3G49080			AT3G14280
	AT4G08685			AT3G07610			AT1G70290			AT1G10340
	AT4G16500			AT3G15095			AT1G76560			AT2G30140
	AT5G09820			AT2G39260			AT4G02450			AT3G26210
	AT4G02330			AT5G28900			AT3G57150			AT1G63530
	AT3G06700			AT1G44770			AT5G58870			AT4G26120
	AT5G27670			AT2G30620			AT1G34750			AT1G05675
	AT4G14420			AT3G17930			AT3G13810			AT1G21550
	AT1G26690			AT4G14410			AT4G00955			AT3G52400
	AT1G55900			AT1G47056			AT1G21900			AT5G62770
	AT1G76060			AT2G37220			AT2G42750			AT5G01100
	AT5G15650			ATMG00080			AT1G31580			AT3G26470
	AT1G53030			AT1G77122			AT4G26850			AT2G46150
	AT3G12340			AT3G25150			AT4G21990			AT2G41100
	AT3G23325			AT4G16150			AT3G02740			AT3G28540
	AT2G35635			AT4G20880			AT3G24170			AT4G14365
	AT4G36920			AT3G28690			AT5G03160			AT3G50480
	AT4G38620			AT4G28570			AT5G49730			AT1G13550
	ATCG00630			AT3G01400			AT4G19640			AT4G31800
	AT2G20490			AT4G01940			AT1G01490			AT4G28390
	AT4G15130			AT5G13680			AT3G50750			AT1G26200
	AT5G11740			AT1G34430			AT4G17900			AT1G61420
	AT5G06450			AT4G35580			AT5G10760			AT2G37980
	AT1G45332			AT5G60360			AT4G27300			AT5G20960
	AT4G23810			AT3G07560			AT3G57550			AT3G28340
	AT1G52280			AT1G63980			AT1G54850			AT5G40780
	AT3G07440			AT5G03940			AT3G07030			AT1G65486
	AT3G13845			AT3G58140			AT3G07050			AT2G27310
	AT3G12370			AT5G60600			AT5G58470			AT1G27730
	AT1G30630			AT1G72150			AT1G61380			AT1G11300
	AT3G13800			AT4G00830			AT2G46450			AT1G08050
	AT4G23140			AT1G52740			AT1G18800			AT5G10760
	AT2G30060			AT1G63680			AT1G71170			AT3G01290
	AT3G06790			AT3G05545			AT3G09200			AT3G09520
	AT4G36420			AT3G53580			AT4G11300			AT5G57220
	AT5G58005			AT1G55340			AT5G64410			AT3G28890
	AT2G21940			AT2G19480			AT5G08139			AT4G18630
	AT1G53035			AT5G04810			AT5G47320			AT4G23160
	AT1G34030			AT1G74850			AT1G07180			AT1G73805
	AT2G25000			AT4G33630			AT1G72450			AT5G37600
	AT2G37990			AT1G03140			AT5G52470			AT4G03450
	AT3G27080			AT4G23980			AT2G41410			AT1G70690
	AT2G06925			AT4G17230			AT5G15950			AT4G37900
	AT5G28300			AT2G26460			AT3G19010			AT2G46270
	AT5G40660			AT1G28060			AT1G67850			AT3G45290
	AT2G45180			AT5G58720			AT5G06320			AT3G17690
	AT3G16810			AT5G20290			AT5G17270			AT5G17330
	AT4G14455			AT5G04290			AT5G59430			AT5G22570
	AT3G55060			AT3G17450			AT4G18010			AT3G25882
	AT4G39200			AT5G42660			AT5G64930			AT4G08555
	AT5G40830			AT2G25290			AT2G47470			AT3G55950
	AT1G05350			AT1G60140			AT4G08850			AT3G25510
	AT4G23710			AT1G67580			AT5G43190			AT3G21780
	AT1G09932			AT3G48870			AT4G30960			AT5G58940
	AT5G62350			AT1G67970			AT3G22660			AT1G01340
	AT3G61850			AT2G45530			AT1G13470			AT5G39050
	AT3G02560			AT4G16490			AT1G26800			AT5G67340
	AT1G12330			AT3G53390			AT1G27290			AT2G02810
	AT5G55610			AT3G27820			AT1G55460			AT1G17745
	AT5G56670			AT1G69220			AT2G31840			AT1G13470
	AT4G33910			AT3G02360			AT1G09210			AT5G24530
	AT2G47680			AT5G43560			AT4G27340			AT5G60280
	AT1G55080			AT5G27320			AT5G45820			AT1G72280
	AT1G72610			AT1G79430			AT1G16670			AT5G25250
	AT5G27430			AT1G02660			AT4G04470			AT4G23610
	AT1G02920			AT4G37120			AT1G08930			AT2G32140
	AT3G49010			AT2G42620			AT4G27830			AT5G42010
	AT1G21690			AT3G58510			AT2G07687			AT4G05020
	AT5G39410			AT3G61050			AT4G28300			AT4G01700
	AT4G40070			AT5G57655			AT4G28350			AT1G07620
	AT3G02740			AT4G14300			AT2G05520			AT3G13090
	AT3G08890			AT3G02760			AT2G05320			AT5G52640
	AT5G11980			AT3G49140			AT5G25900			AT5G55450
	AT5G64670			AT4G03510			AT2G23430			AT3G54960
	AT5G19750			AT5G57950			AT5G44190			AT1G66880
	AT5G28830			AT3G51650			AT1G33520			AT2G20142
	AT5G47320			AT5G63370			AT1G01140			AT5G24210
	AT5G46850			AT2G33435			AT1G66330			AT3G13080
	AT5G11790			AT3G07220			AT5G23510			AT5G44568
	AT5G50720			AT1G01040			AT5G53800			AT4G32870
	AT3G47670			AT1G62390			AT3G51660			AT2G31865
	AT4G08280			AT3G52880			AT3G63310			AT1G56120
	AT1G47960			AT5G61150			AT5G46330			AT3G26840
	AT3G54085			AT3G54760			AT4G03400			AT4G36110
	AT2G14110			AT1G16810			AT4G24190			AT3G63010
	AT2G31300			AT4G39260			AT5G04290			AT3G22060
	AT5G20650			AT2G37920			AT4G04570			AT4G23885
	AT5G37780			AT5G53490			AT4G08580			AT2G17040
	AT1G53040			AT4G28350			AT2G43850			AT1G59590
	AT2G40880			AT1G21160			AT1G62380			AT3G51440
	AT5G64140			AT1G60200			AT1G55920			AT2G29720
	AT2G29530			AT3G19760			AT1G77510			AT5G22380
	AT1G52825			AT3G01610			AT4G37790			AT1G25400
	AT1G36310			AT4G03415			AT4G10080			AT2G15390
	AT2G37190			AT4G01800			AT4G16380			AT4G29520
	AT4G28510			AT3G29290			AT1G20225			AT3G62600
	AT1G53230			AT2G38820			AT4G11570			AT2G38860
	AT4G14365			AT2G39360			AT2G48020			AT2G41410
	AT1G56330			AT1G17550			AT3G01060			AT3G11402
	AT1G30360			AT5G15570			AT4G28260			AT2G35930
	AT1G14580			AT4G14920			AT3G45210			AT5G52750
	AT5G23660			AT4G24220			AT2G40880			AT5G28540
	AT4G18030			AT1G47128			AT4G28400			AT1G30900
	AT1G20460			AT5G25350			AT2G02390			AT5G25930
	AT1G48160			AT1G30610			AT5G58590			AT2G30550
	AT1G78040			AT5G41240			AT4G12720			AT5G60800
	AT1G50670			AT4G25440			AT3G47120			AT1G08450
	AT1G21830			AT1G15940			AT3G51840			AT5G45380
	AT3G55620			AT2G25010			AT5G57070			AT4G37520
	AT4G09320			AT1G10150			AT4G04020			AT5G52810
	AT2G02860			AT2G22740			AT4G26750			AT3G60415
	AT5G62300			AT3G28950			AT5G28020			AT1G45145
	AT3G45290			AT3G61600			AT1G17050			AT3G04060
	AT5G14520			AT2G29080			AT4G25730			AT5G66620
	AT2G16460			AT5G09880			AT2G30250			AT1G76980
	AT2G04520			AT1G65440			AT5G05090			AT5G61790
	AT3G29810			AT3G62130			AT5G10950			AT4G01720
	AT2G47650			AT5G13300			AT5G25350			AT1G66090
	AT4G22690			AT2G01350			AT5G50100			AT3G24090
	AT2G01670			AT1G66180			AT4G36500			AT5G19240
	AT5G58420			AT4G02510			AT5G23760			AT1G72900
	AT1G03030			AT5G13530			AT4G17940			AT1G70140
	AT5G62360			AT5G16180			AT4G16535			AT1G63840
	AT2G27030			AT3G46790			AT1G07310			AT4G33050
	AT4G25680			AT1G32870			AT2G24940			AT4G20110
	AT3G02180			AT1G33680			AT1G78510			AT1G25220
	AT3G24590			AT5G62910			AT1G26761			AT3G12830
	AT1G49600			AT1G10900			AT2G39675			AT4G23030
	AT3G26780			AT2G07180			AT1G71040			AT5G43910
	AT4G02200			AT5G42820			AT1G66880			AT5G25820
	AT1G09780			AT5G62560			AT1G74060			AT1G18570
	AT4G27900			AT2G16640			AT1G64770			AT1G76040
	AT2G21370			AT2G18570			AT5G40580			AT4G04220
	AT1G35720			AT4G30600			AT5G15870			AT3G52430
	AT4G34960			AT1G74450			AT2G35020			AT4G35110
	AT3G52150			AT2G24240			AT3G43740			AT1G62300
	AT5G15490			AT3G11690			AT5G07340			AT1G72520
	AT2G22830			AT5G50020			AT2G43650			AT4G11280
	AT2G44870			AT1G29850			AT1G02170			AT2G15480
	AT2G37940			AT1G20960			AT4G37910			AT2G05380
	AT1G55210			AT3G09650			AT3G15810			AT4G12720
	AT5G25840			AT4G09150			AT4G18205			AT5G16230
	AT1G57610			AT1G19720			AT4G34180			AT1G67360
	AT5G52545			AT5G61330			AT3G12740			AT4G28490
	AT2G40765			AT4G21660			AT2G36930			AT5G09420
	AT1G60770			AT5G10350			AT3G07230			AT1G79450
	AT5G57300			AT5G65380			AT2G44290			AT1G63720
	AT1G09040			AT2G42330			AT3G16520			AT5G15860
	AT1G56580			AT5G15280			AT1G62960			AT1G02450
	AT5G59480			AT5G60570			AT5G40490			AT4G25110
	AT1G13270			AT4G36750			AT5G55860			AT3G08720
	AT5G01850			AT2G23430			AT5G64840			AT3G50800
	AT1G30300			AT4G13460			AT1G27770			AT3G29240
	AT3G52580			AT1G80930			AT5G61310			AT1G09970
	AT5G47710			AT2G42580			AT1G20220			AT2G31880
	AT1G52300			AT4G29940			AT4G16630			AT4G24190
	AT3G62840			AT3G18640			AT4G10970			AT2G44290
	AT3G28940			AT1G67440			AT3G17510			AT1G24140
	AT3G25717			AT1G26580			AT4G05320			AT3G25610
	AT5G56950			AT5G60820			AT1G04530			AT1G22890
	AT3G27210			AT5G11500			AT3G48760			AT5G54710
	AT1G45050			AT1G04960			AT1G65290			AT4G13180
	AT2G36320			AT2G40410			AT4G08310			AT4G30230
	AT2G22900			AT1G20696			AT1G70530			AT4G14390
	AT5G02470			AT1G01490			AT3G11820			AT3G57550
	AT5G35480			AT2G41210			AT2G46220			AT1G09210
	AT3G03180			AT3G23750			AT2G39570			AT3G17420
	AT5G50840			AT5G44180			AT3G23540			AT1G56660
	AT5G16390			AT3G19240			AT4G19170			AT5G17760
	AT1G54260			AT1G74380			AT1G03740			AT2G40000
	AT3G07910			AT3G19290			AT1G50300			AT3G11010
	AT2G03440			AT2G16485			AT1G31970			AT1G21750
	AT1G05810			ATMG00640			AT1G13080			AT1G14360
	AT2G16510			AT3G28730			AT4G13530			AT1G77810
	AT3G13050			AT2G41710			AT2G19650			AT5G66640
	ATCG01020			AT2G39840			AT5G58920			AT5G42050
	AT2G43760			AT2G21150			AT5G67030			AT1G65040
	AT5G48250			AT4G33080			AT1G08370			AT2G29990
	AT5G48680			AT3G46610			AT5G53550			AT1G48320
	AT5G17630			AT3G06080			AT5G47120			AT1G75170
	AT5G10870			AT1G64140			AT1G21750			AT1G61260
	AT5G18850			AT2G04350			AT4G00100			AT5G39785
	AT5G14790			AT1G08600			AT2G37990			AT1G60730
	AT4G35260			AT4G23630			AT3G49010			AT3G45860
	AT1G53760			AT3G20550			AT5G10070			AT1G76970
	AT2G41475			AT4G16190			AT3G03740			AT4G23230
	AT4G11850			AT4G17100			AT5G23520			AT2G26440
	AT3G24506			AT3G52850			AT1G04960			AT4G13920
	AT5G49015			AT5G05210			AT1G23710			AT1G51760
	AT2G03220			AT3G45300			AT1G10150			AT1G01010
	ATCG00400			AT5G12480			AT2G30530			AT2G23680
	AT5G23880			AT2G20280			AT3G02520			AT5G54720
	AT1G80500			AT3G12550			AT3G24490			AT3G19580
	AT1G52630			AT5G16780			AT2G33480			AT3G46930
	AT2G04340			AT1G70750			AT5G57120			AT4G01010
	AT1G71865			AT5G10950			AT5G26210			AT4G23220
	AT1G62330			AT2G37410			AT1G04280			AT3G07520
	AT5G55850			AT5G16730			AT3G24070			AT5G54840
	AT5G48540			AT2G13840			AT5G12480			AT4G01750
	AT5G52060			AT5G53930			AT2G34730			AT2G04430
	AT1G63670			AT5G23890			AT2G15320			AT4G39230
	AT2G04240			AT3G27570			AT5G35480			AT3G55980
	AT5G07090			AT1G65580			AT2G15910			AT4G20830
	AT5G13440			AT3G09980			AT5G48180			AT2G24600
	AT2G32980			AT1G24160			AT5G13180			AT3G04640
	AT5G38660			AT3G11530			AT5G42050			AT1G28190
	AT3G13410			AT4G10790			AT5G50380			AT5G03160
	AT2G28605			AT5G43630			AT5G62430			AT3G18830
	AT3G47930			AT1G28050			AT1G58180			AT3G59700
	AT4G11280			AT1G72820			AT5G16130			AT2G40095
	AT4G01480			AT1G50460			AT1G56460			AT4G29780
	AT3G25500			AT5G25630			AT5G23540			AT2G29120
	AT1G14010			AT2G18390			AT4G28570			AT1G27330
	AT2G01090			AT2G45770			AT3G10810			AT1G56550
	AT5G48370			AT5G58320			AT3G07780			AT4G22530
	AT5G54920			AT5G12400			AT5G15200			AT1G62422
	AT5G51400			AT3G25840			AT2G16500			AT2G37710
	AT3G63120			AT2G02870			AT2G30520			AT1G23840
	AT4G33780			AT1G64990			AT3G51880			AT1G64610
	AT1G30320			AT1G26270			AT3G51980			AT3G22400
	AT5G15050			AT2G32450			AT5G46780			AT1G35710
	AT4G39840			AT2G01410			AT3G47670			AT5G06320
	AT3G05070			AT2G44430			AT2G37940			AT5G66630
	AT4G39540			AT3G25230			AT1G50670			AT1G47480
	AT1G51730			AT1G28490			AT2G29400			AT1G15790
	AT1G61790			AT5G27720			AT2G27285			AT5G08790
	AT5G27120			AT3G02710			AT4G08920			AT3G60450
	AT2G24860			AT3G07030			AT5G57710			AT1G12200
	AT1G22200			AT1G07320			AT4G27390			AT5G10380
	AT2G36470			AT4G11160			AT5G24930			AT5G15870
	AT1G73490			AT5G10960			AT4G16143			AT1G14370
	AT3G28920			AT4G13110			AT2G44210			AT2G26560
	AT5G46030			AT4G24660			AT1G04000			AT1G68440
	AT4G17890			AT1G66260			AT3G28950			AT5G54860
	AT2G23600			AT4G13530			AT1G70490			AT5G58620
	AT2G36930			AT5G20190			AT1G72890			AT1G68840
	AT1G57620			AT3G30380			AT1G76360			AT1G24575
	AT5G39730			AT5G61830			AT5G66060			AT1G25560
	AT4G23885			AT5G56340			AT1G31810			AT2G47000
	AT3G26670			AT4G20360			AT5G03660			AT3G50920
	AT1G12750			AT1G30480			AT3G11660			AT1G01560
	AT5G53880			AT4G27120			AT4G26910			AT2G25110
	AT1G67850			AT4G13670			AT2G03730			AT2G38470
	AT4G09830			AT5G36170			AT3G17000			AT2G20560
	AT3G01290			AT3G57750			AT3G49601			AT3G44720
	AT4G00860			AT4G28025			AT5G07820			AT1G09560
	AT1G08530			AT5G67030			AT1G67550			AT5G40720
	AT5G02870			AT3G51270			AT1G32530			AT2G13790
	AT5G39210			AT1G60650			AT3G13480			AT1G42990
	AT5G11280			AT5G65940			AT3G02770			AT2G36580
	AT3G51010			AT1G71360			AT4G22000			AT3G19010
	AT1G06130			AT2G29590			AT4G16830			AT3G54640
	AT5G42980			AT1G44810			AT3G52280			AT2G14560
	AT1G03860			AT3G23070			AT3G11780			AT4G26060
	AT2G29960			AT1G29340			AT5G04720			AT1G12210
	AT3G19150			AT2G27980			AT3G06040			AT1G16090
	AT5G16380			AT1G80350			AT2G01100			AT1G71880
	AT3G09390			AT5G63530			AT1G22930			AT3G55470
	AT1G80400			AT5G62030			AT3G46550			AT1G61360
	AT3G54810			AT1G53720			AT1G68670			AT3G10500
	AT1G68050			AT1G17640			AT3G14050			AT1G72680
	AT5G16010			AT1G76720			AT4G26110			AT1G02360
	AT5G63110			AT4G14540			AT3G29075			AT2G33580
	AT4G16710			AT5G04760			AT5G62390			AT2G40140
	AT2G43640			AT4G08230			AT3G07680			AT4G39890
	AT3G53610			AT1G20920			AT5G17900			AT3G03470
	AT2G39675			AT5G14440			AT3G54470			AT1G27980
	AT4G00330			AT5G43950			AT4G21800			AT3G20960
	AT5G65830			AT4G02720			AT5G66210			AT1G04600
	AT3G14290			AT1G03910			AT5G04920			AT3G01800
	AT5G52870			AT2G45590			AT5G15450			AT3G25020
	AT2G43350			AT3G15120			AT5G05210			AT1G67850
	AT4G38545			AT3G06980			AT1G30640			AT3G51430
	AT4G36360			AT2G30100			AT1G75410			AT5G22290
	AT4G13270			AT1G26800			AT3G59060			AT3G09010
	AT4G13500			AT2G33730			AT5G21090			AT4G22980
	AT4G28400			AT5G45190			AT3G28480			AT2G31020
	AT2G18245			AT5G41670			AT1G28120			AT1G62840
	AT4G37090			AT1G56230			AT4G34350			AT1G21000
	AT2G30990			AT1G08550			AT5G41600			AT3G11080
	AT5G20500			AT1G21200			AT5G11960			AT5G47120
	AT5G61020			AT1G72770			AT3G47250			AT1G21250
	AT4G29480			AT3G46620			AT5G08080			AT1G18890
	AT3G03770			AT4G11300			AT1G79670			AT5G54140
	AT4G20300			AT4G28260			AT3G24480			AT1G12290
	AT1G31410			AT2G32690			AT1G47970			AT3G50910
	AT1G15260			AT4G16680			AT2G29960			AT5G41740
	AT5G44580			AT4G03430			AT3G47500			AT4G39950
	AT3G57550			AT3G26580			AT4G39140			AT5G26340
	AT1G59960			AT5G18630			AT4G18880			AT2G02350
	AT5G64640			AT3G29310			AT5G49890			AT5G60950
	AT1G66660			AT4G26455			AT2G23090			AT4G15530
	AT2G23930			AT1G06410			AT3G24080			AT1G68690
	AT2G43630			AT1G64680			AT1G03030			AT1G30755
	AT3G06550			AT1G54410			AT5G65720			AT5G49680
	AT4G02010			AT1G10580			AT2G39720			AT1G21900
	AT2G36160			AT1G03280			AT2G45030			AT4G08850
	AT5G37055			ATCG00440			AT1G30270			AT3G10985
	AT2G01250			AT2G38400			AT2G46500			AT2G17120
	AT5G20590			AT1G48030			AT3G20250			AT5G41750
	AT2G39460			AT1G72050			AT1G74250			AT1G71100
	AT1G70670			AT1G68790			AT4G13010			AT2G04400
	AT2G35610			AT1G68490			AT2G04880			AT3G09020
	AT1G74520			AT2G01470			AT3G18790			AT4G18010
	AT4G32400			AT1G64500			AT5G14540			AT5G61070
	AT4G37610			AT5G58040			AT1G75510			AT5G46500
	AT1G15970			AT3G05160			AT2G01820			AT5G50460
	AT5G39360			AT2G30470			AT5G44340			AT1G55210
	AT2G38470			AT3G13360			AT3G14720			AT2G47470
	AT5G09620			AT4G00270			AT1G01320			AT4G34150
	AT1G63460			AT1G52620			AT1G23820			AT1G18910
	AT3G62250			AT3G11410			AT1G21600			AT4G16660
	AT5G38530			AT1G13190			AT3G46740			AT1G21390
	AT1G19370			AT1G66840			AT1G70410			AT3G48090
	AT1G24145			AT1G30270			AT2G36350			AT3G03440
	AT3G05510			AT3G05670			AT2G36240			AT5G45110
	AT2G41880			AT5G58710			AT1G03680			AT1G56340
	AT3G25540			AT1G70820			AT1G78610			AT1G32940
	AT5G08590			AT5G62390			AT1G22700			AT1G71910
	AT1G18640			AT5G19450			AT4G23940			AT1G34420
	AT2G23090			AT1G74230			AT1G45474			AT5G55460
	AT1G28540			AT4G22000			AT4G25130			AT4G39270
	AT3G45260			AT3G23000			AT1G75800			AT2G31060
	AT5G25440			AT1G66240			AT5G41260			AT1G18390
	AT4G25280			AT2G42040			AT4G27800			AT5G53120
	AT1G77610			AT1G76810			AT1G05140			AT3G09830
	AT3G07680			AT4G17940			AT1G02560			AT5G61250
	AT4G14615			AT5G37350			AT3G14172			AT5G08760
	AT4G35550			AT2G21950			AT4G04890			AT1G25370
	AT1G13110			AT1G30090			AT1G80380			AT4G24920
	AT4G28450			AT1G74510			AT5G60710			AT4G26990
	AT1G32990			AT4G35540			AT4G21860			AT5G16170
	AT3G53620			AT3G09850			AT4G37000			AT2G37690
	AT1G17860			AT1G77180			AT4G13460			AT3G26220
	AT3G11500			AT2G37550			AT5G12250			AT5G58710
	AT4G18905			AT4G16830			AT2G21170			AT2G23320
	AT3G23300			AT4G26080			ATCG00270			AT1G21370
	AT4G32150			AT5G48160			AT3G15360			AT2G20110
	AT3G23490			AT1G64950			AT5G22620			AT5G26860
	AT1G07360			AT5G55660			AT5G52840			AT2G23810
	AT3G05590			AT2G17030			AT1G15690			AT5G11650
	AT1G70630			AT1G32530			AT5G24300			AT1G29310
	AT3G20620			AT1G54740			ENSRNA049494871			AT1G34750
	AT3G12390			AT2G39010			AT1G16860			AT5G18310
	AT3G18820			AT1G64330			AT4G19530			AT1G27350
	AT2G47610			AT1G05380			AT5G46860			AT1G24150
	AT1G32330			AT5G51970			AT1G07250			AT1G21050
	AT2G47110			AT1G07510			AT1G05850			AT5G03350
	AT4G03520			AT1G68720			AT4G04640			AT4G08230
	AT5G20700			AT1G68520			AT1G71720			AT1G61370
	AT2G45190			AT5G65890			AT1G56300			AT4G23570
	AT3G16565			AT1G24560			AT2G38010			AT3G47090
	AT5G13310			AT2G05320			AT3G63540			AT3G16030
	AT1G73540			AT1G65660			AT5G38520			AT2G16720
	AT5G07000			AT2G44820			AT1G04410			AT4G29740
	AT4G05400			AT4G38710			AT4G09040			AT5G01610
	AT4G22140			AT4G02450			AT5G24460			AT5G46080
	AT3G18740			AT3G24740			AT3G51140			AT1G69720
	AT2G36530			AT3G57930			AT5G61810			AT5G25770
	AT5G64920			AT4G01000			AT3G63410			AT3G14990
	AT5G55120			AT4G26630			AT5G46390			AT4G23320
	AT4G26910			AT3G19990			AT1G19370			AT1G05010
	AT3G21270			AT3G59040			AT5G37310			AT1G12420
	AT3G15030			AT5G18950			AT4G19100			AT2G22500
	AT3G09735			AT5G19120			AT1G50900			AT3G49120
	AT5G18100			AT2G21300			AT2G13360			AT1G27770
	AT4G08520			AT4G15030			AT1G16880			AT1G17860
	AT3G25040			AT2G02160			AT5G58250			AT3G21560
	AT1G72500			AT5G61990			AT1G53800			AT2G03120
	AT1G64770			AT4G08460			AT1G07420			AT2G46620
	AT3G07890			AT3G47120			AT5G05740			AT1G11330
	AT4G13930			AT1G60870			AT1G76580			AT4G18880
	AT4G23540			AT2G36120			AT1G03160			AT4G29900
	AT1G04430			AT1G03470			AT1G65070			AT4G08290
	AT5G17610			AT3G51880			AT1G41830			AT2G28400
	AT1G76940			ATCG00290			AT5G20280			AT2G30250
	AT4G08850			AT3G50080			AT3G15690			AT3G09440
	AT5G05170			AT3G57180			AT3G15110			AT2G21850
	AT3G10810			AT4G12670			AT1G73885			AT1G66920
	AT3G27430			AT5G58470			AT3G02910			AT5G25440
	AT4G18040			AT5G47660			AT1G80480			AT5G22250
	AT2G31580			AT3G07780			AT5G13120			AT5G61010
	AT2G18290			AT1G70570			AT4G31530			AT5G01850
	AT5G67590			AT5G51370			AT1G64390			AT3G19930
	AT2G20630			AT5G67320			AT1G29390			AT5G04720
	AT5G40950			AT1G67230			AT3G10160			AT1G05570
	AT2G41430			AT2G38370			AT3G16910			AT4G13510
	AT1G07090			AT5G42360			AT2G40540			AT4G14420
	AT1G27470			AT5G06160			AT3G55450			AT5G41180
	AT4G23430			AT1G68440			AT1G15140			AT1G09300
	AT4G22330			AT1G32130			AT5G50160			AT1G08930
	AT3G42150			AT1G80790			AT3G25480			AT3G26910
	AT1G03150			AT1G76820			AT5G12140			AT3G24503
	AT5G23540			AT4G17550			AT5G45472			AT5G54610
	AT3G07300			AT4G08310			AT5G26820			AT5G27600
	AT1G77885			AT5G24930			AT3G52500			AT5G22060
	AT3G44370			AT2G35680			AT1G71500			AT5G07340
	AT1G76180			AT3G11100			AT5G07020			AT2G26170
	AT2G31140			AT3G26000			AT3G04790			AT5G53550
	AT1G74270			AT4G25390			AT1G78995			AT5G51830
	AT3G50760			AT3G53710			AT5G04360			AT4G23010
	AT3G21350			AT2G35795			AT5G57630			AT5G16480
	AT1G24310			AT3G53890			AT2G15890			AT3G56400
	AT1G31812			AT5G58340			AT3G07670			AT3G14470
	AT1G09810			AT3G07690			AT1G67660			AT2G44400
	AT4G17510			AT5G46620			AT2G18710			AT1G07000
	AT4G32240			AT1G70890			AT5G42270			AT1G32920
	AT5G53770			AT5G66060			AT2G02070			AT1G33720
	AT1G74060			AT3G55760			AT1G64150			AT3G16720
	AT5G20010			AT1G55460			AT2G16365			AT5G06960
	AT5G06360			AT5G58200			AT3G26740			AT4G32940
	AT1G06515			AT5G50380			AT1G07320			AT5G06750
	AT1G13380			AT5G24320			AT4G33670			AT3G47540
	AT2G02180			AT2G04865			AT3G14240			AT1G69840
	AT1G17730			AT4G32070			AT1G14720			AT1G52600
	AT4G33865			AT3G48800			AT1G43670			AT5G48380
	AT3G51160			AT5G57120			AT5G63420			AT5G42440
	AT2G33250			AT5G54660			AT5G65700			AT1G17250
	AT5G25540			AT4G23440			AT5G16470			AT5G16930
	AT5G13070			AT2G35330			AT2G45560			AT1G51790
	AT1G07020			AT3G06130			AT5G65220			AT4G37640
	AT1G16470			AT4G33980			AT3G25660			AT5G63790
	AT5G14430			AT3G48120			AT2G25840			AT5G62020
	AT3G51500			AT4G14510			AT4G02130			AT5G05460
	AT1G72630			AT5G14770			AT4G24750			AT3G07720
	AT4G11150			AT5G17760			AT1G06460			AT2G46430
	AT3G53240			AT5G53800			AT1G75350			AT4G27280
	AT4G34150			AT1G27190			AT1G76080			AT4G27010
	AT5G23870			AT2G33410			AT3G11700			AT2G17290
	AT3G07650			AT1G15830			AT4G17100			AT4G24040
	AT5G01350			AT2G31840			AT2G21280			AT3G44260
	AT3G56800			AT5G39570			AT1G76590			AT1G26690
	AT2G33390			AT4G04960			AT1G01470			AT3G28930
	AT3G02900			ENSRNA049493349			AT1G68560			AT1G03760
	AT4G13040			AT1G11260			AT2G30860			AT3G11840
	AT5G13030			AT3G05760			AT4G33350			AT5G24810
	AT1G22070			AT4G32340			AT3G10060			AT2G41110
	AT2G33845			AT3G50630			AT1G10930			AT2G34260
	AT5G57370			AT4G18520			AT4G34830			AT5G28830
	AT1G60780			AT1G17070			AT4G12800			AT5G13190
	AT3G29360			AT5G67190			AT5G63810			AT3G04670
	AT4G21215			AT5G53440			AT5G47110			AT2G02390
	AT1G18570			AT1G80360			AT1G07770			AT2G25000
	AT3G63390			AT1G71180			AT3G60750			AT3G19260
	AT2G39705			AT1G65280			AT1G20340			AT1G71040
	AT5G58575			AT1G15230			AT5G42130			AT4G02930
	AT3G56120			AT4G38680			AT1G13930			AT1G67940
	AT3G56580			AT1G03560			AT2G47590			AT4G27830
	AT2G30260			AT3G24490			AT2G01290			AT1G33560
	AT2G30930			AT1G80550			AT2G47850			AT2G17720
	AT3G49720			AT5G53220			AT5G51545			AT5G18130
	AT1G55820			AT1G11930			AT1G09795			AT1G71697
	AT5G30495			AT3G14180			AT5G22640			AT4G26910
	AT5G57630			AT5G02530			AT5G44660			AT2G41835
	AT1G71800			AT2G02360			AT1G51940			AT4G34390
	AT1G47710			AT1G06530			AT3G48730			AT2G32920
	AT1G76700			AT1G32630			AT5G66520			AT1G67060
	AT1G69960			AT3G06325			AT5G11740			AT1G03210
	AT2G33480			AT1G77740			AT5G03240			AT5G64410
	AT2G23610			AT1G50300			AT3G12780			AT2G34940
	AT4G11260			AT1G45249			AT2G47940			AT3G05200
	AT3G25520			AT5G55670			AT3G53800			AT1G74210
	AT4G29590			AT4G34000			AT3G05625			AT1G23090
	AT1G09330			AT1G54060			AT1G20010			AT4G16960
	AT1G47830			AT1G78510			AT3G52380			AT3G51980
	AT3G61460			AT4G21620			AT1G07590			AT2G31990
	AT2G09795			AT4G08580			ATCG00470			AT4G15550
	AT2G25190			AT2G17840			AT4G34260			AT5G58350
	AT3G04460			AT3G12800			AT2G21790			AT1G73500
	AT3G23030			AT5G17900			AT1G75690			AT1G32700
	AT2G40020			AT4G07400			AT1G07110			AT1G51660
	AT2G26580			AT3G05130			AT3G62410			AT5G06860
	AT2G32600			AT5G13770			AT5G65630			AT4G35500
	AT1G02780			ATMG01330			AT5G08280			AT1G80610
	AT2G22425			AT4G27410			AT2G26500			AT4G30910
	AT4G24820			AT3G24520			AT5G60540			AT3G12740
	AT1G53850			AT5G60030			AT3G03770			AT1G77920
	AT3G29270			AT5G65820			AT3G46970			AT5G40690
	AT4G11330			AT5G63030			AT5G51820			AT5G10600
	AT4G00100			AT3G06355			AT3G62700			AT5G14640
	AT1G27760			AT3G12600			AT1G35720			AT1G14200
	AT5G22320			AT2G02230			AT2G05920			AT4G02220
	AT5G22875			AT5G40340			AT5G55710			AT2G36800
	AT4G18070			AT3G50060			AT3G54050			AT4G12120
	AT1G10700			AT5G58920			AT4G19410			AT4G04570
	AT2G23770			AT1G33970			AT3G54920			AT5G64870
	AT1G20810			AT3G06780			AT4G28660			AT5G04930
	AT3G25140			AT2G17350			AT5G46510			AT1G14010
	AT1G76730			AT2G25650			AT2G20890			AT5G51770
	AT5G64160			AT2G22080			AT5G04885			AT4G27410
	AT1G57765			AT4G16535			AT1G22430			AT5G54500
	AT4G30220			AT1G71720			AT5G14910			AT5G47420
	AT2G02450			AT2G47450			AT3G55360			AT3G11820
	AT2G04360			AT2G44200			AT1G01080			AT1G07890
	AT4G33050			AT3G09250			AT5G36120			AT5G61600
	AT3G23620			AT3G17160			AT2G22670			AT1G61250
	AT1G11350			AT5G67250			AT3G27850			AT2G39710
	AT4G20380			AT4G39880			AT3G14930			AT1G67800
	AT2G03510			AT1G71170			AT5G61480			AT5G17060
	AT1G75500			AT5G15820			AT4G18240			AT3G57540
	AT3G14350			AT1G33520			AT5G39830			AT1G68710
	AT5G64600			AT2G37970			AT1G24625			AT1G44800
	AT1G71940			AT2G28400			AT1G05562			AT2G30020
	AT2G05940			AT4G10080			AT2G26730			AT5G61210
	AT2G44210			AT1G67590			ATCG00300			AT4G26970
	AT4G02340			AT5G13100			AT1G78450			AT5G27830
	AT1G51805			AT1G15340			AT3G52750			AT1G72700
	AT1G05385			AT5G23680			AT3G59820			AT4G11850
	AT1G64510			AT2G28910			AT4G26370			AT4G17720
	AT5G51570			AT5G41020			AT4G22830			AT1G63380
	AT5G20920			AT3G50690			AT1G13640			AT2G21500
	AT1G21060			AT3G28540			AT5G02240			AT1G45332
	AT2G19540			AT2G23290			AT1G52220			AT3G45040
	AT4G18205			AT3G22660			AT2G23120			AT5G12480
	AT1G03740			AT3G29575			AT1G27630			AT1G77660
	AT1G35190			AT3G49601			AT1G71695			AT5G38210
	AT2G29580			AT2G20690			AT5G06390			AT1G16500
	AT2G45000			AT3G56360			AT1G48350			AT1G30640
	AT1G30210			AT1G75190			AT4G05631			AT3G61280
	AT3G02580			AT3G41761			AT4G12420			AT1G13990
	AT4G12310			AT3G24080			AT4G33625			AT4G22840
	AT5G08300			AT4G37260			AT3G06325			AT2G02220
	AT3G12260			AT5G38150			AT4G17600			AT1G61380
	AT3G19010			AT1G42550			AT1G32990			AT3G09490
	AT5G52880			AT1G26761			AT4G30660			AT3G28480
	AT1G21750			AT2G47400			AT1G60600			AT1G65790
	AT5G13850			AT2G11910			AT2G43030			AT3G45620
	AT3G14410			AT1G74250			AT1G04990			AT3G29575
	AT1G02270			AT4G17520			AT5G54770			AT5G62620
	AT5G16830			AT1G17530			AT2G39900			AT1G55265
	AT3G45640			AT4G39960			AT4G27600			AT3G50470
	AT5G57815			AT2G35540			AT2G37660			AT4G26270
	AT5G25760			AT3G24070			AT5G47190			AT3G04720
	AT1G59580			AT2G38230			AT4G25100			AT1G31010
	AT1G43890			AT1G76560			AT4G26520			AT3G01080
	AT1G17290			AT5G25240			AT2G47390			AT4G25900
	AT5G59610			AT3G10020			AT2G38550			AT5G21090
	AT5G55190			AT3G58840			AT2G34090			AT1G31280
	AT1G09920			ATMG01390			AT3G47650			AT2G45510
	AT3G51100			AT5G48180			AT5G14320			AT4G29810
	AT2G44440			AT1G47970			ATCG00550			AT5G27120
	AT1G71697			ATMG00020			AT3G49260			AT3G22231
	AT5G50430						AT4G30350			AT5G45500
	AT3G60770						AT1G54040			AT3G27280
	AT5G23710						AT5G58550			AT4G22590
	AT2G01600						AT4G33700			AT1G59710
	AT4G17870						AT1G27480			AT3G13380
	AT2G23890						AT5G59290			AT4G14220
	AT1G62640						AT1G73655			AT4G35600
	AT3G05060						AT2G30570			AT2G29070
	AT5G08240						AT1G48480			AT1G03290
	AT2G19790						AT1G20020			AT1G77500
	AT3G62560						ATCG00350			AT3G13940
	AT1G22450						AT4G38430			AT4G00955
	AT5G19855						AT3G63190			AT3G22235
	AT1G20580						AT1G48210			AT4G28510
	AT1G16320						AT1G22590			AT4G29330
	AT4G07825						AT5G09820			AT5G14930
	AT4G31340						AT5G59690			AT4G17900
	AT3G47600						AT1G04040			AT5G18780
	AT3G24350						AT5G16660			AT1G21400
	AT5G63570						AT4G29140			AT3G53670
	AT5G48380						AT3G56370			AT1G29690
	AT2G47060						AT3G25920			AT5G64660
	AT5G63880						AT5G48600			AT3G13330
	AT5G54760						AT3G53990			AT4G25340
	AT1G53310						AT3G19820			AT2G31390
	AT5G23240						AT1G21680			AT5G23850
	AT3G22290						AT4G17560			AT3G02520
	AT5G47310						AT2G29630			AT5G36220
	AT1G04190						AT5G49900			AT4G33300
	AT3G29075						AT1G08550			AT3G20250
	AT3G51040						AT4G18270			AT1G67330
	AT4G04614						AT5G27280			AT4G23470
	AT3G63400						AT2G18940			AT4G04920
	AT2G20370						AT5G19780			AT1G30620
	AT3G10480						AT5G01530			AT5G64400
	AT1G21380						AT1G70370			AT1G30270
	AT5G54750						AT1G49010			AT2G46600
	AT3G12200						ATCG00800			AT5G17990
	AT3G07470						AT3G47070			AT5G56030
	AT3G56840						AT1G12310			AT1G16670
	AT4G26570						AT1G51610			AT1G13210
	AT2G39170						AT3G44890			AT5G11970
	AT3G11660						AT4G09020			AT1G13260
	AT1G20100						AT4G04330			AT5G09590
	AT4G32470						AT3G54400			AT1G65820
	AT3G58010						AT2G01830			AT3G59660
	AT1G79020						AT1G77490			AT2G39400
	AT4G19640						AT5G67480			AT3G05230
	AT5G54680						AT3G53900			AT1G56110
	AT1G69760						AT5G01890			AT4G11840
	AT2G17340						AT3G26060			AT5G53370
	AT1G10310						AT2G37220			AT5G18480
	AT2G43080						AT3G13120			AT4G31790
	AT5G67500						AT2G19310			AT2G05940
	AT3G55450						AT5G22340			AT4G12290
	AT2G47840						AT1G26230			AT5G54110
	AT5G64020						AT1G17100			AT3G57330
	AT5G25360						AT1G69830			AT4G00970
	AT5G23280						AT2G35500			AT4G21800
	AT1G23030						AT5G23050			AT1G22410
	AT5G11880						AT5G19370			AT5G05730
	AT3G17590						AT4G00165			AT1G11905
	AT2G40060						AT2G22230			AT4G18890
	AT3G04590						AT1G70890			AT4G22780
	AT5G13280						AT3G63140			AT1G11310
	AT1G30580						AT4G39710			AT5G65210
	AT5G40200						ATCG00810			AT4G25390
	AT4G04470						AT2G01950			AT3G51890
	AT5G36290						AT1G20620			AT3G27210
	AT3G24830						ENSRNA049493837			AT5G60900
	AT4G22310						AT3G11630			AT3G26090
	AT1G31940						AT3G48420			AT1G22180
	AT5G52450						AT1G29070			AT5G33290
	AT1G53460						AT5G20830			AT3G55880
	AT2G39770						AT4G12730			AT1G53280
	AT3G27230						AT1G10760			AT2G44500
	AT1G08845						AT1G22530			AT2G35020
	AT4G25720						AT3G12120			AT5G40760
	AT3G56590						AT1G31812			AT5G63680
	AT2G46390						AT5G24060			AT5G64550
	AT2G20760						AT1G30360			AT1G06000
	AT1G49820						AT2G35370			AT4G02550
	AT1G72020						AT4G27560			AT1G22070
	AT4G34700						AT2G40550			AT4G34710
	AT3G09740						AT2G15970			AT5G66910
	AT2G17380						AT1G19150			AT1G30420
	AT5G55990						AT5G52190			AT2G45030
	AT1G73030						AT3G42660			AT1G67120
	AT1G73840						AT3G09390			AT2G44180
	AT1G13450						AT3G04550			AT1G22280
	AT3G58560						AT5G22880			AT5G39040
	AT1G56590						AT1G79440			AT2G19570
	AT2G34900						AT1G09200			AT4G36648
	AT4G13830						AT4G33480			AT5G42150
	AT4G17170						AT1G78630			AT3G52470
	AT4G04210						AT5G40450			AT3G53810
	AT3G15260						AT2G03420			AT3G48080
	AT4G26300						AT3G55630			AT3G07700
	AT1G31850						AT5G63310			AT1G55910
	AT3G13810						AT5G62700			AT3G57280
	AT3G05100						AT2G17240			AT3G14050
	AT4G27090						AT4G01150			AT2G32800
	AT4G00550						AT5G52970			AT2G05320
	AT5G66360						AT2G05790			AT2G11520
	AT5G26751						AT1G49230			AT4G31860
	AT1G66410						AT4G32340			AT3G44400
	AT5G11960						AT5G63780			AT5G46520
	AT3G19553						AT4G14960			AT2G30580
	AT5G06140						AT5G67100			AT5G51070
	AT5G67490						AT5G05160			AT3G10640
	AT2G03680						AT1G29395			AT3G07680
	AT4G26720						AT1G28050			AT3G06450
	AT4G36970						AT4G20890			AT5G22350
	AT5G62610						AT2G38140			AT5G15730
	AT3G04600						AT5G65360			AT3G23120
	AT1G53510						AT4G25270			AT4G17070
	AT3G01720						AT5G45680			AT4G09570
	AT2G44610						AT5G18700			AT2G26600
	AT2G44180						AT3G09050			AT5G61030
	AT1G51200						AT2G25730			AT5G53400
	AT5G40810						AT3G54210			AT3G46620
	AT3G08590						AT3G29030			AT4G31500
	AT1G31280						AT5G49160			AT2G15080
	AT1G63490						AT5G55730			AT1G75200
	AT5G10610						AT3G53460			AT1G69270
	AT1G79350						AT1G54570			AT2G02370
	AT5G53500						AT2G33800			AT5G27430
	AT5G47820						AT1G50010			AT1G66250
	AT1G56145						AT2G22450			AT1G49050
	AT3G10770						AT2G36145			AT2G17760
	AT4G19860						AT2G31270			AT1G07220
	AT5G27840						AT1G49650			AT2G33210
	AT1G66200						AT4G39970			AT3G22942
	AT1G28420						AT3G58570			AT2G41490
	AT1G65590						AT4G23820			AT5G47580
	AT5G24470						AT4G29840			AT1G51270
	AT2G13440						AT5G62720			AT4G16630
	AT5G43130						AT5G21920			AT1G11475
	AT1G80070						ENSRNA049494594			AT2G03510
	AT5G63620						AT1G32090			AT5G39020
	AT4G29130						AT2G17840			AT3G63030
	AT3G55460						AT4G31060			AT5G45470
	ATMG01350						AT3G09070			AT2G47730
	AT1G17440						AT4G31290			AT2G44660
	AT5G16810						AT2G06850			AT2G33480
	AT3G58050						AT1G31850			AT1G59870
	ATCG00710						AT5G15230			AT3G53830
	AT1G55350						AT5G61000			AT5G66320
	AT3G04080						AT4G17090			AT1G48210
	AT1G44770						AT3G61870			AT2G24240
	AT4G34660						AT3G07320			AT1G72330
	AT4G37270						AT5G39410			AT5G01210
	AT1G70070						AT2G29550			AT5G07770
	AT1G36990						AT3G15520			AT4G11660
	AT4G31570						AT5G58600			AT4G16957
	AT3G28690						AT3G16250			AT3G02230
	AT5G13640						AT3G21760			AT4G29950
	AT1G34430						AT1G51060			AT1G78570
	AT3G58680						AT5G51010			AT3G49530
	AT3G17850						AT4G02060			AT1G09070
	AT1G74960						AT1G22770			AT3G28940
	AT2G24570						AT5G62360			AT3G05830
	AT2G18440						AT5G11150			AT2G03450
	AT5G22000						AT1G17650			AT1G24147
	AT5G15850						AT1G12460			AT5G45510
	AT1G72710						AT1G64890			AT2G40950
	AT2G29400						AT3G62030			AT1G59660
	AT5G47690						AT2G25930			AT3G13310
	ATCG00520						AT2G36570			AT5G58120
	AT5G41940						AT4G20270			AT2G19130
	AT2G46920						AT1G67630			AT1G64460
	AT3G49800						AT1G20030			AT4G29110
	AT1G20980						AT5G02890			AT4G28450
	AT1G07910						AT2G05160			AT2G45790
	AT4G39680						AT1G72970			AT1G31130
	AT1G61300						AT5G14550			AT4G05050
	AT1G21630						AT5G26570			AT3G26230
	AT4G34890						AT4G19120			AT1G42480
	AT2G17110						AT5G59870			AT1G10410
	AT2G36810						AT1G04730			AT3G56800
	AT3G11910						AT2G42530			AT1G72770
	AT2G42490						AT4G26670			AT2G37970
	AT1G70610						AT5G08410			AT5G08300
	AT3G17450						AT4G16146			AT4G36090
	AT1G49670						AT3G06355			AT3G03920
	AT1G80030						AT2G36390			AT1G77030
	AT3G46980						AT4G28780			AT2G24550
	AT4G37460						ATCG00690			AT1G53310
	AT1G27510						AT3G10410			AT2G01670
	AT5G25560						AT4G17140			AT4G22820
	AT4G11110						AT5G18660			AT1G48370
	AT1G50200						AT2G43800			AT5G56010
	AT1G04230						AT3G47860			AT1G07640
	AT1G06400						AT4G00020			AT5G45800
	AT4G35800						AT1G24170			AT4G00500
	AT5G54870						AT5G58310			AT5G43190
	AT3G56860						AT1G64760			AT2G36670
	AT5G55700						AT3G63160			AT3G53780
	AT5G54830						AT2G43550			AT4G23170
	AT2G29190						AT5G61380			AT5G62570
	AT1G65930						AT1G04620			AT5G59550
	AT1G02020						AT2G36200			AT2G31740
	AT5G51450						AT2G21660			AT1G17600
	ATMG00510						AT4G30650			AT5G39950
	AT2G29650						AT2G19450			AT1G80440
	AT1G16610						AT3G01500			AT2G13800
	AT2G42620						ATCG00330			AT5G56350
	AT1G61210						AT5G10400			AT2G28940
	AT4G22780						AT5G23240			AT2G28890
	AT1G24460						AT5G54930			AT1G29060
	AT2G22090						AT5G52310			AT1G30410
	AT2G13370						AT5G50450			AT1G32230
	AT5G63020						AT4G13250			AT2G01650
	AT5G37190						AT2G28900			AT4G23850
	AT5G16370						AT5G24470			AT4G17230
	AT4G37480						AT2G21130			AT3G17000
	AT1G61690						AT3G59350			AT2G34250
	AT3G59410						AT4G29610			AT5G63030
	AT3G58500						AT2G07727			AT5G47730
	AT3G44530						AT1G14250			AT4G38260
	AT3G10030						AT5G10605			AT5G35200
	AT4G30200						AT1G16850			AT2G35940
	AT5G35180						AT2G42540			AT2G41220
	AT1G07040						AT2G04965			AT2G01190
	AT1G05960						AT3G05800			AT2G22480
	AT1G30810						AT3G50120			AT5G26030
	AT1G03060						AT3G46640			AT5G19980
	AT1G06900						AT3G51740			AT1G07670
	AT2G31510						AT1G53035			AT4G30190
	AT1G18485						AT5G15780			AT3G51660
	AT4G27120						AT2G10940			AT1G17500
	AT4G08500						AT3G11020			AT5G05410
	AT4G00060						AT5G15970			AT1G07630
	AT4G27470						AT5G48250			AT1G71220
	AT5G45190						AT5G57110			AT3G15980
	AT1G60940						AT1G68050			AT2G26190
	AT5G04460						AT5G60100			AT2G24360
	AT1G33415						AT3G06880			AT5G02290
	AT4G15475						AT2G40080			AT1G01720
	AT5G41150						AT4G07385			AT4G28570
	AT4G16310						AT1G67370			AT1G74330
	AT3G02050						AT1G07050			AT5G08380
	AT4G34460						AT5G20630			AT2G25510
	AT2G28070						AT3G07650			AT5G63490
	AT5G62790						AT4G33980			AT3G02770
	AT1G64740						AT5G42900			AT5G66210
	AT2G44500									AT1G29240
	AT2G46560									AT3G16565
	AT1G56290									AT4G21180
	AT4G26450									AT4G02940
	AT1G60420									AT5G47070
	AT5G25060									AT4G17830
	AT5G21222									AT1G10050
	AT4G13530									AT4G38790
	ATMG00513									AT4G34180
	AT5G20840									AT2G17220
	AT5G66810									AT2G45070
	AT1G76080									AT3G56990
	AT3G62900									AT5G05190
	AT1G61140									AT3G05380
	AT4G18140									AT5G07830
	AT4G14160									AT2G15042
	AT4G19520									AT5G12890
	AT4G29380									AT3G07090
	AT5G34850									AT5G53330
	AT5G18640									AT5G35080
	AT1G07320									AT2G27580
	AT4G16280									AT3G56170
	AT4G38760									AT4G01660
	AT5G04540									AT1G20100
	AT1G15280									AT5G03630
	AT3G63445									AT2G12550
	AT3G43230									AT3G50550
	AT3G19840									AT4G11370
	AT5G13650									AT5G10650
	AT3G03380									AT3G28450
	AT5G56340									AT3G13235
	AT5G40670									AT1G69250
	AT5G66720									AT3G15760
	AT4G18600									AT1G80460
	AT1G12290									AT3G23990
	AT5G08720									AT3G46440
	AT3G12550									AT5G01820
	AT4G38430									AT2G37940
	ATCG00730									AT3G22310
	AT1G21170									AT3G18370
	AT5G42360									AT2G25520
	AT5G06600									AT1G77370
	AT2G37550									AT2G27150
	AT4G02880									AT5G54780
	AT2G02360									AT1G02170
	AT5G47480									AT5G59420
	AT5G66200									AT1G63860
	AT3G51640									AT3G06540
	AT4G30600									AT5G55130
	AT1G06670									AT1G61790
	AT5G57360									AT4G02410
	AT2G30520									AT4G11300
	AT2G47070									AT5G47140
	AT2G26890									AT2G24570
	AT1G10830									AT3G26670
	AT1G48620									AT3G01720
	AT1G19485									AT4G21580
	AT5G47750									AT3G05970
	AT3G54010									AT3G14620
	AT5G05480									AT4G08470
	AT1G21200									AT2G17200
	AT1G55370									AT1G61140
	AT1G74800									AT4G33360
	AT2G12550									AT1G67970
	AT4G16760									AT1G11890
	AT1G07380									AT1G74100
	AT4G13670									AT4G13615
	AT5G13680									AT5G11000
	AT2G42580									AT3G26600
	AT5G35210									AT5G07440
	AT2G03140									AT3G22330
	ATMG00560									AT5G19690
	AT5G63160									AT4G25800
	AT2G03550									AT3G49350
	AT1G30440									AT3G28950
	AT4G29350									AT3G09810
	AT4G32020									AT4G29960
	AT1G21680									AT3G07390
	AT3G62130									AT3G51160
	AT3G59910									AT1G18260
	AT3G09360									AT1G12360
	AT5G26600									AT5G43100
	AT1G63360									AT4G37910
	AT4G16860									AT1G60420
	AT5G19620									AT4G22670
	AT3G08840									AT5G15980
	AT1G50460									AT2G17130
	AT2G34710									AT3G07780
	AT1G29880									AT4G00550
	AT3G58640									AT2G29400
	AT3G17800									AT2G17420
	AT2G25760									AT3G57150
	AT2G25010									AT2G45010
	AT2G03150									AT2G01450
	AT5G61830									AT1G22840
	AT1G21980									AT5G19550
	AT1G45150									AT4G10970
	AT1G79000									AT2G43850
	AT1G03680									AT2G45500
	AT5G19000									AT5G51640
	AT5G02860									AT1G31580
	AT3G16620									AT2G46450
	AT5G22640									AT4G33920
	AT1G30270									AT5G56250
	AT4G17140									AT2G19710
	AT3G07560									AT1G52780
	AT1G21610									AT3G03560
	ATCG00680									AT4G01610
	AT1G75130									AT3G47820
	AT4G17330									AT4G24160
	AT3G07220									AT2G39220
	AT5G53170									AT2G31870
	AT2G43020									AT5G47910
	AT1G10320									AT1G58180
	AT2G46520									AT1G52160
	ATCG00160									AT1G54320
	AT1G72680									AT3G45640
	AT5G58410									AT4G23540
	AT2G46020									AT4G11670
	AT1G11060									AT1G79110
	AT5G42250									AT5G05110
	AT1G29700									AT3G54850
	AT3G12290									AT3G56950
	AT5G54080									AT3G03110
	AT1G70530									AT3G60160
	AT2G39930									AT2G39270
	AT5G23110									AT4G14110
	AT4G00450									AT2G31955
	AT5G46180									AT3G21220
	AT3G20250									AT1G33420
	AT1G62830									AT1G19270
	AT2G04940									AT5G65200
	AT1G72300									AT1G55450
	AT2G39730									AT5G17380
	AT2G42600									AT1G04280
	AT3G27570									AT1G71210
	AT4G15840									AT3G58600
	AT3G58750									AT3G17700
	AT4G16950									AT5G44070
	AT4G35580									AT2G20320
	AT2G24240									AT4G25720
	AT4G13550									AT1G31540
	AT5G13720									AT2G36330
	AT3G58140									AT4G01810
	AT1G07990									AT1G35580
	AT5G63370									AT5G40240
	AT2G31660									AT2G17790
	AT4G29040									AT5G61060
	ATCG00290									AT2G24180
	AT5G20380									AT1G10730
	AT5G10350									AT4G21150
	AT3G57300									AT2G37250
	AT5G43740									AT5G18490
	AT5G43190									AT4G29050
	AT5G44510									AT3G44480
	AT5G22270									AT3G15000
	AT1G15940									AT1G75510
	AT5G58720									AT1G64060
	AT1G03910									AT2G16430
	AT3G18060									AT5G47860
	AT3G03300									AT4G25730
	AT1G10610									AT4G33430
	AT4G00040									AT5G47200
	AT2G21340									AT5G57035
	AT3G27700									AT2G35790
	AT4G24520									AT3G44630
	AT4G38440									AT4G36945
	AT4G35450									AT3G60800
	AT3G56630									AT3G48760
	AT3G02690									AT3G22845
	AT3G50370									AT2G23450
	AT1G49520									AT1G55820
	AT3G47060									AT4G28300
	AT5G35170									AT5G49570
	AT5G44800									AT3G56880
	AT4G01000									AT4G08500
	AT5G48610									AT4G33910
	AT5G24670									AT5G52820
	AT2G37520									AT2G02360
	AT2G26740									AT3G21295
	AT3G08850									AT3G60190
	AT2G22430									AT5G11030
	AT1G07110									AT1G77890
	AT3G06290									AT1G03370
	AT5G03230									AT3G17340
	AT2G17930									AT1G56330
	AT5G22800									AT1G16970
	AT1G66130									AT3G24180
	AT5G27280									AT2G46500
	AT3G06450									AT3G06860
	AT3G57410									AT3G02710
	AT1G77180									AT2G20010
	AT2G48000									AT3G48890
	AT5G45820									AT3G04580
	AT1G58250									AT5G64430
	AT3G22270									AT5G66850
	AT3G59940									AT5G55850
	AT4G18820									AT4G30490
	AT4G10790									AT2G43350
	AT4G28260									AT1G10865
	AT3G26100									AT2G40520
	AT1G28140									AT4G38550
	AT2G17840									AT2G45240
	AT4G17620									AT1G15430
	AT1G19740									AT5G04170
	AT3G56140									AT2G43080
	AT3G50000									AT2G17520
	AT4G28652									AT4G37790
	AT5G42270									AT3G54100
	AT4G39420									AT5G52870
	AT1G79280									AT3G22370
	AT4G12610									AT1G04870
	AT3G11020									AT5G16880
	AT1G72150									AT3G51920
	AT2G16500									AT3G03610
	AT2G27950									AT1G03860
	AT2G24200									AT4G01370
	AT4G11830									AT4G36210
	AT4G16143									AT2G32160
	AT5G24690									AT5G51630
	AT5G13980									AT3G52800
	AT4G37120									AT2G23890
	AT1G70480									AT3G44340
	AT3G54230									AT5G20910
	AT3G54440									AT3G44670
	AT5G37370									AT5G62680
	AT3G56410									AT4G19880
	AT4G27180									AT3G55960
	AT2G22910									AT5G65750
	AT5G59250									AT1G22930
	AT5G62190									AT1G28280
	AT5G20300									AT4G33565
	AT4G22190									AT2G20420
	AT1G08550									AT2G40360
	AT2G16250									AT1G26800
	AT5G44190									AT5G51570
	AT3G60110									AT4G35310
	AT3G19770									AT1G15120
	AT3G43300									AT1G23710
	AT5G61580									AT2G45140
	AT5G15020									AT1G71170
	AT1G44810									AT2G33590
	AT2G04270									AT3G51000
	AT3G05760									AT1G65540
	AT5G57120									AT1G12990
	AT3G03140									AT1G69440
	AT2G38820									AT4G25880
	AT5G50920									AT2G21520
	AT2G26570									AT1G33390
	AT3G13224									AT1G76390
	AT4G34100									AT2G33490
	ATCG00530									AT1G48850
	AT1G10390									AT1G64710
	AT3G51000									AT1G10290
	AT1G29357									AT1G25480
	AT1G66900									AT2G25140
	AT5G49470									AT2G45000
	AT2G47700									AT1G74170
	AT2G26080									AT3G17240
	AT3G29240									AT1G07520
	AT4G39400									AT1G20510
	AT2G20280									AT3G53270
	AT5G48810									AT3G17800
	AT1G33400									AT5G66010
	AT3G15010									AT4G04960
	AT1G15200									AT3G59020
	AT2G19130									AT1G26270
	AT2G38550									AT1G19300
	AT2G33770									AT1G78920
	AT3G54670									AT1G74340
	AT5G66055									AT1G79610
	AT5G62650									AT1G23440
	AT2G40860									AT5G42140
	AT5G35750									AT1G79380
	AT1G44910									AT2G03530
	AT4G36080									AT4G34120
	AT3G53710									AT4G16110
	AT3G15880									AT5G66675
	AT4G38250									AT5G09330
	AT5G51690									AT1G23900
	AT4G32850									AT4G19990
	AT4G29940									AT1G61660
	AT4G04970									AT5G55070
	AT3G54460									AT5G04920
	AT1G30450									AT5G18900
	AT5G49430									AT1G25390
	AT4G00270									AT1G62740
	AT5G66900									AT1G14740
	AT4G00750									AT5G07360
	AT4G08480									AT4G34630
	AT5G45060									AT5G04870
	AT4G11790									AT3G05760
	AT2G33590									AT2G45910
	AT2G20120									AT5G04410
	AT5G49930									AT3G07570
	AT1G36070									AT1G67470
	AT1G03140									AT3G63460
	AT4G19040									AT5G36880
	AT1G79560									AT5G15650
	AT4G05631									AT3G07370
	AT2G01570									AT5G61450
	AT4G31390									AT3G56410
	AT4G20850									AT3G09735
	AT1G55920									AT1G19360
	AT5G53540									AT4G28400
	AT3G44310									AT4G25840
	AT2G32080									AT4G24400
	AT3G28860									AT4G24330
	AT5G46470									AT4G27470
	AT3G17470									AT4G32010
	AT1G17580									AT5G03290
	AT5G58800									AT2G15320
	AT1G17210									AT4G27500
	AT5G16150									AT5G22650
	AT5G64290									AT3G04120
	AT1G74260									AT5G10840
	AT5G41240									AT1G27470
	AT2G33051									AT5G45480
	AT1G30290									AT1G07030
	AT1G07670									AT5G42790
	AT1G13220									AT1G04200
	AT5G42390									AT1G13000
	AT1G01070									AT5G40300
	AT1G76490									AT5G01450
	AT3G04490									AT5G03380
	AT2G18570									AT3G47810
	AT3G12360									AT3G15810
	AT3G53890									AT5G66680
	AT4G36980									AT5G07300
	AT1G22860									AT5G07820
	AT4G32930									AT4G30340
	AT5G03280									AT1G54150
	AT3G23080									AT4G28480
	AT3G29760									AT2G24200
	AT5G24740									AT2G02800
	AT1G45248									AT3G55270
	AT5G16300									AT5G08630
	AT1G73710									AT4G29000
	AT5G63800									AT5G44580
	AT1G23870									AT2G26230
	AT5G45472									AT5G45550
	AT5G40470									AT5G16510
	AT4G37930									AT1G16540
	AT3G19290									AT5G25540
	AT4G25960									AT3G21810
	AT3G42630									AT3G17810
	ATMG00520									AT4G31170
	AT3G47890									AT3G05050
	AT1G79030									AT4G15010
	AT5G55060									AT2G20760
	AT3G30390									AT3G17410
	AT4G38690									AT3G21640
	AT5G04560									AT5G25265
	AT3G07700									AT3G12280
	AT2G45530									AT5G67540
	AT2G36850									AT4G39140
	AT5G46760									AT5G51290
	AT5G46490									AT4G25640
	AT5G19900									AT2G18220
	AT5G04900									AT1G56460
	AT3G25690									AT5G43780
	AT2G26670									AT4G28710
	AT3G55770									AT4G11260
	ATCG00550									AT5G37780
	AT1G13750									AT3G11330
	AT1G71820									AT2G44530
	AT5G57950									AT2G31350
	AT4G18160									AT2G01100
	AT1G70290									AT3G15260
	AT1G13440									AT5G01950
	AT3G48060									AT1G25580
	AT1G67440									AT4G14800
	AT1G29340									AT3G27890
	AT4G03200									AT1G27100
	AT2G13360									AT4G15470
	AT3G48430									AT5G03490
	AT1G10660									AT1G54990
	AT4G38220									AT4G05320
	AT2G37035									AT1G07650
	AT3G03680									AT2G34357
	AT4G35440									AT3G21630
	AT3G29290									AT1G05350
	AT3G24170									AT5G57580
	AT5G02840									AT3G63310
	AT2G39000									AT3G03950
	AT5G41370									AT4G16210
	AT1G11410									AT4G39820
	AT3G06480									AT4G21540
	AT2G18915									AT1G05180
	AT5G36170									AT5G20010
	AT2G22740									AT5G23520
	AT5G42950									AT3G56310
	AT3G27820									AT4G28060
	AT5G01820									AT5G64370
	AT3G06455									AT3G62830
	AT5G04360									AT5G59140
	AT2G31960									AT3G19450
	AT3G19670									AT1G24460
	AT1G75540									AT1G49710
	AT1G28050									AT1G80420
	AT5G01590									AT5G66070
	AT1G05150									AT1G12000
	AT5G55600									AT5G03320
	AT2G39870									AT3G52280
	AT2G14740									AT1G17290
	AT4G21110									AT3G44110
	AT1G62750									AT4G25515
	AT1G27170									AT2G40650
	AT4G25170									AT5G22000
	AT1G27190									AT4G03550
	AT4G35300									AT1G70160
	AT1G77122									AT1G12760
	AT3G17930									AT5G23540
	AT5G04020									AT1G74230
	AT1G08190									AT5G26751
	AT1G12780									AT2G01600
	AT3G47500									AT5G13200
	AT5G53150									AT5G46780
	AT2G32680									AT1G56450
	AT4G31880									AT2G33845
	AT1G01960									AT2G19540
	AT3G62660									AT4G21810
	AT3G08020									AT5G61530
	AT5G20610									AT3G66654
	AT4G27020									AT3G29400
	AT1G01510									AT3G26510
	AT2G25170									AT3G05090
	AT5G48160									AT3G42790
	AT5G54770									AT5G22950
	AT4G10070									AT5G01720
	AT4G35090									AT3G16785
	AT1G76850									AT2G14720
	AT2G48020									AT5G19440
	AT3G23000									AT3G27380
	AT5G43730									AT3G12760
	AT3G27325									AT5G62610
	AT3G55610									AT3G61860
	AT3G52850									AT4G29040
	AT3G51075									AT4G22260
	AT5G64560									AT4G08180
	AT3G09250									AT3G13810
	AT1G68020									AT1G05910
	AT2G01850									AT5G13500
	AT1G51500									AT3G09840
	AT2G31751									AT3G54010
	AT3G23150									AT1G56510
	AT5G43920									AT1G03740
	AT2G38370									AT1G60490
	AT1G60200									AT1G27450
	AT1G28060									AT3G11880
	AT5G04590									AT3G23540
	AT2G32230									AT1G04120
	AT1G72180									AT1G79930
	AT3G11530									AT4G26750
	AT5G58550									AT1G14510
	AT5G60360									AT3G46920
	AT4G10060									AT1G16470
	AT1G20540									AT2G40270
	AT2G35800									AT3G48780
	AT5G08230									AT5G43900
	AT3G25150									AT2G26510
	AT2G42790									AT2G40940
	AT4G29790									AT2G01140
	AT5G58920									AT2G44350
	AT1G53720									AT1G17080
	AT5G45500									AT5G63380
	AT3G59040									AT3G26900
	AT1G24560									AT5G55710
	AT3G51840									AT4G35760
	AT3G21750									AT5G35630
	AT4G14870									AT5G04430
	AT5G14060									AT2G01320
	AT5G53370									AT4G18710
	AT5G57050									AT3G06650
	AT5G50400									AT2G23390
	AT1G07728									AT1G77122
	AT2G35110									AT4G00340
	AT5G40720									AT3G02540
	AT5G54730									AT3G14310
	AT3G05900									AT2G14910
	AT5G43560									AT1G42550
	AT3G23750									AT3G45600
	AT3G06080									AT3G63540
	AT5G13800									AT3G17100
	AT1G03080									AT1G79970
	AT5G61310									AT3G62980
	AT1G12050									AT5G16730
	AT1G55310									AT2G39190
	AT2G25290									AT1G27921
	AT5G42825									AT1G32220
	AT5G23050									AT3G50790
	AT4G16130									AT3G15380
	AT5G56210									AT5G04140
	AT1G14030									AT5G06340
	AT3G54760									AT2G38650
	AT2G16640									AT3G54900
	AT5G64390									AT2G28800
	AT1G22040									AT2G26910
	AT5G62020									AT3G52230
	AT2G16950									AT4G04890
	AT3G19760									AT1G07250
	AT4G31540									AT1G80480
	AT2G25200									AT4G32260
	AT2G17650									AT1G31190
	AT2G23430									AT3G02450
	AT1G50030									AT1G18670
	AT3G22970									AT1G72160
	AT2G30470									AT3G53990
	AT2G45770									AT2G04842
	AT3G04930									AT3G24480
	AT5G11770									AT5G42130
	AT1G12230									AT2G13440
	AT1G01770									AT3G60630
	AT4G20880									AT3G02720
	ATCG00170									AT1G21600
	AT3G53830									AT1G62430
	ATCG01090									AT1G24610
	AT5G60840									AT2G39250
	AT1G68910									AT2G21170
	AT5G13300									AT4G34920
	AT1G58030									AT2G23760
	AT3G24740									AT4G15545
	AT3G53390									AT3G08010
	AT4G08580									AT4G13670
	AT1G54780									AT1G16020
	AT5G65940									AT2G45990
	AT1G55960									AT3G17210
	ATMG00665									AT2G02070
	AT1G03300									AT3G02580
	AT1G28260									AT1G16860
	AT1G02420									ATCG00750
	AT1G79040									AT5G09870
	AT2G25520									AT1G33290
	AT4G15180									AT5G46390
	AT1G70160									AT3G22104
	AT2G28200									AT5G42310
	AT1G20160									AT3G50530
	AT1G07590									AT5G24060
	AT5G13010									AT1G34000
	AT4G35240									AT5G67360
	AT1G74470									AT4G37200
	AT2G05215									AT5G10020
	AT2G21970									AT3G63520
	AT4G25080									AT3G28070
	AT5G16180									AT3G02050
	AT3G10270									AT3G32930
	AT1G34000									AT4G18390
	AT3G52250									AT1G74850
	AT2G20820									AT1G68020
	AT5G15870									AT2G43910
	AT4G16070									AT2G38040
	AT1G52520									AT5G14970
	AT4G17230									AT3G22960
	AT1G67580									AT5G35100
	AT1G20560									AT1G76490
	AT1G07810									AT5G08415
	AT1G72820									AT5G08280
	AT5G64280									AT4G29590
	AT5G16760									AT5G60710
	AT1G21400									AT5G01590
	AT4G12020									AT4G33700
	AT4G23050									AT3G62110
	AT1G16110									AT1G72150
	AT4G21350									AT2G04280
	AT2G07687									AT1G67900
	AT2G13840									AT1G55970
	AT5G60600									AT1G64430
	AT5G01710									AT4G27600
	AT2G35060									AT5G47840
	AT1G07010									AT1G76080
	AT4G10590									AT5G20380
	AT5G19290									ATCG00160
	AT5G10960									AT2G39670
	AT3G09230									AT3G59040
	AT1G19715									AT3G16260
	AT4G03030									AT3G59970
	AT2G01470									AT2G35155
	AT1G19450									AT5G42270
	AT4G31850									AT3G53920
	AT5G37830									AT4G18810
	AT1G47128									AT3G52155
	AT2G34680									AT2G41680
	AT5G60850									AT5G18590
	AT3G02260									AT5G24470
	AT1G08920									AT5G66190
	AT2G41220									AT3G04790
	AT3G61600									AT5G16630
	AT2G31380									AT2G24420
	AT5G03340									AT4G33670
	ATCG01060									AT1G53840
	AT1G12640									AT1G03160
	AT3G17740									AT5G06290
	AT1G31930									AT2G36120
	AT5G60680									AT1G04620
	AT5G37350									AT1G10960
	AT1G31810									AT5G47020
	AT4G36990									AT1G30330
	AT4G38060									AT2G45950
	AT5G04140									AT4G01800
	AT2G25970									AT5G19220
	AT3G62590									AT2G48070
	AT5G01530									AT4G26700
	AT2G28290									AT1G01540
	AT3G06670									AT2G35690
	ATMG01380									ATCG01010
	AT2G21950									AT1G06190
	AT2G21330									AT3G09820
	AT4G28490									AT1G30360
	AT2G34730									AT4G28760
	AT3G02130									AT5G28020
	AT1G07250									AT5G10470
	AT1G10470									AT2G36000
	AT4G20360									AT4G23440
	AT2G25490									AT1G65320
	AT5G10800									AT5G04510
	AT1G20620									AT1G49890
	AT5G12310									AT4G17300
	AT5G10050									AT1G36160
	AT5G27320									AT3G55360
	AT5G12950									AT1G20090
	ATCG00720									AT5G43880
	AT4G19200									AT2G26730
	AT2G17350									AT2G41560
	AT5G12430									AT2G27680
	AT5G14080									AT3G55080
	AT2G30600									AT3G44160
	AT4G24690									AT3G54660
	AT4G30720									AT2G32480
	AT1G18330									AT3G48190
	AT1G23200									ATCG01120
	AT3G10650									AT2G31360
	AT4G08290									AT2G01290
	AT2G19110									AT3G26450
	ATCG00300									AT1G58440
	AT2G29080									AT5G38150
	AT1G68010									AT2G42190
	AT3G46620									AT5G14260
	AT1G15290									AT2G18560
	AT3G49140									AT5G13980
	AT2G41530									AT2G48120
	AT3G19960									AT5G05170
	AT4G33630									AT4G13500
	AT1G48090									AT1G49560
	AT1G80350									AT4G34190
	AT1G10020									AT2G24150
	AT5G60580									AT5G46580
	AT1G64990									AT5G64030
	AT5G18670									AT3G07670
	AT1G70690									AT5G13650
	AT3G05680									AT3G46640
	AT1G36180									AT1G34430
	AT5G57610									AT5G17310
	AT1G33680									AT1G51580
	AT4G03510									AT5G42900
	AT2G25660									AT2G35830
	AT1G11910									AT2G34770
	AT3G45830									AT1G29390
	AT1G23740									AT3G17510
	AT2G24270									AT1G78680
	AT2G33310									AT4G16650
	AT1G76590									AT4G30993
	AT4G01610									AT1G80030
	AT3G16290									AT5G55960
	AT5G63320									AT1G73920
	AT2G43060									AT2G01620
	AT1G32750									AT4G38970
	AT5G62430									AT5G11790
	AT1G32360									AT4G20260
	AT5G49740									AT1G19920
	AT2G24820									AT4G36250
	AT5G61150									AT1G72410
	AT4G37760									AT3G08510
	AT1G80440									AT1G31420
	AT3G54720									AT1G09010
	AT3G22980									AT4G30660
	AT4G37820									AT3G62660
	AT3G57610									AT5G28300
	AT4G17840									AT5G13120
	AT4G16900									AT2G32230
	AT1G01830									AT3G18040
	ATCG00330									AT5G11580
	AT1G13190									AT1G12230
	AT1G17220									ATCG00250
	AT3G11100									AT1G73060
	AT1G64950									AT1G70940
	AT5G03940									AT4G14510
	AT5G27350									AT2G03550
	AT5G62560									AT2G38010
	AT5G10930									AT4G20360
	AT3G30300									AT5G55540
	AT4G39880									AT3G06150
	AT1G22190									AT5G51970
	AT1G44170									AT5G06060
	AT1G75310									AT1G03680
	AT3G48190									AT3G60750
	AT2G07180									AT5G63700
	AT1G22850									AT2G39930
	AT1G53780									AT3G03710
	AT4G13840									AT2G37660
	AT5G64170									AT3G55250
	AT3G11690									AT4G37920
	AT1G02305									AT4G35450
	AT3G50685									AT2G05620
	AT1G30500									AT5G47780
	AT5G57655									AT3G05220
	AT5G45410									AT5G62790
	AT2G48110									AT3G46970
	AT4G16830									AT1G68530
	AT1G70320									AT5G54380
	AT5G52120									AT5G57930
	AT4G25100									AT2G01110
	AT4G25290									AT5G40950
	AT3G23590									AT4G01050
	AT5G27690									AT2G39130
	AT5G03900									AT5G44650
	AT4G10120									AT4G34490
	AT4G09150									AT1G10740
	AT3G51430									AT1G15730
	AT1G30400									AT3G04260
	AT5G13630									AT1G69830
	ATCG00140									AT1G15690
	AT5G67260									AT3G46610
	AT4G08350									AT3G56680
	AT1G80180									AT3G46550
	AT1G64140									AT5G02250
	AT3G24490									AT2G47450
	AT5G04810									AT1G01090
	AT1G49140									AT1G23400
	AT2G44230									AT5G58330
	AT4G36040									AT5G26742
	AT4G02840									AT2G38330
	AT1G06570									AT2G15820
	AT3G01670									AT1G22850
	AT1G79940									AT3G06430
	AT2G45590									AT1G22700
	AT5G13210									AT4G31780
	AT3G04750									AT5G10480
	AT3G54210									AT5G42100
	AT2G41210									AT1G78915
	AT4G30110									AT1G03930
	AT3G04060									AT2G35840
	AT3G62770									AT3G48610
	AT3G26570									AT1G78610
	AT3G22330									AT5G43810
	AT1G05940									AT1G74960
	AT1G80360									AT1G56500
	AT4G14990									AT4G17050
	AT5G17760									AT3G14420
	AT5G40890									AT4G35470
	AT4G23980									AT2G34860
	AT2G11910									AT5G59750
	AT4G24800									AT1G15500
	AT1G79600									AT5G20140
	AT5G04720									AT1G02110
	AT3G21755									AT3G52750
	AT1G30490									AT3G10270
	AT4G15550									AT5G15050
	AT3G48690									AT5G55230
	AT3G10740									AT1G60230
	AT4G33740									AT5G65460
	AT5G08139									AT4G13840
	AT2G26460									AT5G06220
	AT3G04340									AT4G04640
	AT1G80310									AT2G20230
	AT2G43260									AT3G16140
	AT4G13560									AT1G05140
	AT1G54740									AT2G18160
	AT5G10690									AT2G30390
	AT1G48320									AT2G26110
	AT5G47560									AT4G36390
	AT2G35795									AT1G44446
	ATMG00690									AT5G52780
	AT1G26550									AT5G04360
	AT3G06980									AT1G73170
	AT1G72050									AT2G35620
	AT2G22660									AT3G55760
	AT3G14270									AT5G19780
	AT4G38770									AT3G53700
	AT3G05545									AT1G80380
	AT2G30100									AT5G11480
	AT1G66840									AT5G51110
	AT3G28730									AT1G14720
	AT1G50250									AT1G52220
	AT4G30940									AT2G40490
	AT2G30570									AT1G07050
	AT1G10150									AT3G09860
	AT1G30610									AT3G47860
	AT2G02870									AT2G05920
	AT1G60140									AT2G44650
	AT3G04350									AT1G33810
	AT1G11720									AT1G71810
	AT3G08660									AT3G16290
	AT2G27310									AT2G16280
	AT1G08450									AT2G35260
	ATMG01370									AT5G60540
	AT3G01370									AT4G22830
	AT2G01410									AT3G26300
	AT2G39010									AT2G26930
	AT3G51650									AT1G70200
	AT3G29670									AT3G12780
	AT3G07610									AT3G46630
	AT3G26400									AT1G11440
	AT4G02070									AT3G49470
	AT1G77800									AT1G65960
	AT3G24520									AT3G62630
	AT4G26288									AT3G08740
	AT5G13100									AT3G18290
	AT2G21170									AT3G60530
	AT5G23150									AT3G29290
	AT4G15030									AT1G01770
	AT5G15537									AT5G10540
	AT1G21000									AT3G23820
	AT4G29060									AT2G39450
	AT1G66345									AT5G37020
	AT5G54390									AT4G34980
	AT3G50840									AT1G48600
	AT5G42680									AT1G17840
	AT5G17900									AT5G64580
	AT3G62950									AT2G03350
	AT1G02660									AT4G03280
	AT3G08910									AT4G11175
	AT5G24120									AT3G05160
	AT3G58570									AT1G60990
	AT3G18535									AT5G44190
	AT4G36730									AT2G19860
	AT5G67190									AT2G35410
	AT1G58190									AT2G21960
	AT2G41710									AT5G08650
	AT5G58340									AT1G69690
	AT3G54500									AT5G39830
	AT4G37980									AT3G56010
	AT1G13320									AT1G44920
	AT5G55840									AT5G57040
	AT5G58110									AT2G31170
	AT4G38600									AT1G01170
	AT5G59780									AT2G47600
	AT5G08450									AT3G02250
	AT4G34430									AT3G08680
	AT5G65890									AT3G04940
	AT1G36160									AT1G61740
	AT5G09220									AT1G02150
	AT5G16730									AT1G31650
	AT1G12220									AT2G26500
	AT2G40000									AT4G23890
	AT5G54590									AT3G14650
	AT1G16030									AT1G71500
	AT3G48870									AT3G23480
	AT3G45210									AT2G32970
	AT5G65820									ATCG00780
	AT1G54100									AT1G70820
	AT2G18700									AT4G33010
	AT4G25700									AT5G09650
	AT1G03090									AT1G08200
	AT1G13020									AT5G65700
	AT3G51480									AT5G38510
	AT2G44430									AT3G01690
	AT5G53460									AT4G18070
	AT5G57710									AT1G63680
	AT4G11660									AT2G04039
	AT3G57180									AT1G30440
	AT5G04490									AT5G06390
	AT5G20190									AT1G75460
	AT5G16780									AT4G26555
	AT1G01040									ATCG00810
	AT3G09650									AT4G14360
	AT5G19450									AT5G65310
	AT5G58200									AT4G02130
	AT3G01610									AT5G64740
	AT2G44130									AT3G05625
	AT3G18790									AT1G54350
	AT1G71180									AT2G34710
	AT1G20220									AT3G63370
	AT2G21300									AT1G31330
	AT3G20550									AT1G54780
	AT4G36520									AT5G26850
	AT1G60160									AT2G29360
	AT4G30790									AT1G52150
	AT2G04350									AT2G35450
	AT2G29670									AT3G43610
	AT2G24545									ATCG00450
	AT2G39260									AT5G58520
	AT4G34630									AT2G39140
	AT4G11160									AT5G18100
	AT4G01037									AT2G42300
	AT2G07727									ENSRNA049494991
	AT1G79750									AT3G17860
	AT3G48050									AT2G01570
	AT5G44790									AT5G59250
	AT1G56230									AT4G12800
	AT1G65660									AT5G42030
	AT5G07740									AT4G21960
	AT4G15490									AT3G01370
	AT3G58660									AT3G63410
	ATMG00640									AT1G19715
	AT3G48000									AT1G44575
	AT3G58510									AT5G04900
	AT1G32450									AT4G02790
	AT2G36340									AT1G19220
	AT3G62010									ATCG00200
	AT2G28630									AT5G54770
	AT5G18960									AT3G27770
	AT5G61330									AT2G43010
	AT5G02810									AT3G57190
	AT3G48800									AT2G24020
	AT4G01800									AT5G45650
	AT2G42330									AT4G36190
	AT5G27270									AT3G04730
	AT3G27020									AT1G78040
	AT4G16150									AT5G62430
	AT3G47420									AT5G50280
	AT2G33435									AT1G60010
	AT5G21970									AT3G51420
	AT5G11700									AT1G13860
	AT1G21160									AT5G48880
	AT1G66180									AT4G00370
	AT1G73480									AT2G17695
	AT4G13460									AT1G30130
	AT5G65720									AT5G30510
	AT2G45920									AT3G09210
	AT1G68520									AT5G50180
	AT1G02640									AT1G57770
	AT1G50970									AT5G58340
	AT3G46610									ATCG00790
	AT4G00830									AT4G29070
	AT5G53220									AT1G53450
	AT1G24160									AT3G08670
	AT2G38400									AT5G64340
	AT4G11560									AT1G64860
	AT3G43920									AT3G48730
	AT5G43670									AT2G31040
	AT3G27925									AT3G14415
	AT2G31840									AT1G67660
	ATCG00270									AT3G17470
	AT1G68490									AT5G52010
	AT3G45300									AT5G52440
	AT4G32480									AT2G34590
	AT3G23070									AT3G04550
	AT4G32340									AT5G07900
	AT3G04160									AT4G30825
	AT3G26560									AT2G21280
	AT3G26000									AT2G13360
	AT1G64680									AT5G06690
	AT5G56100									AT1G21350
	AT5G53970									AT4G30950
	AT3G26380									AT1G74940
	AT3G25010									AT4G33470
	AT5G53480									AT5G46110
	AT3G26580									AT5G32450
	AT1G30090									AT5G46420
	AT1G21920									AT2G18710
	AT1G08420									AT1G73470
	AT1G55860									AT1G70610
	AT3G09920									AT2G23610
	AT3G09840									AT4G30400
	AT1G79430									AT1G24764
	AT1G03280									AT1G17220
	AT4G34030									AT4G32410
	AT3G18390									AT1G28670
	AT4G18520									AT5G19390
	AT1G01780									AT3G16000
	AT1G53560									AT1G08540
	AT3G06500									AT3G19180
	ATCG00190									AT3G07360
	AT1G30840									AT1G30570
	AT5G58040									AT2G21530
	AT3G14180									AT1G03130
	AT3G29680									AT5G48830
	AT1G11175									AT2G32440
	AT4G13340									AT3G04810
	AT1G68440									AT5G10800
	AT4G08230									AT4G17090
	AT3G04310									AT2G27050
	AT1G69220									AT2G21385
	AT1G08600									AT1G53040
	AT1G21410									AT1G07180
	AT3G50630									AT1G48030
	AT4G14920									AT5G07020
	AT1G17680									AT3G02830
	AT2G19930									AT1G56230
	AT1G26800									AT4G21750
	AT2G32540									AT2G35880
	AT4G39160									AT1G65070
	AT4G19170									AT3G51820
	ATCG00120									AT3G60130
	AT3G05220									AT4G14870
	AT4G03430									AT4G18240
	AT5G21020									AT3G15110
	AT1G48030									AT5G56860
	AT5G02575									AT5G44660
	AT1G15230									AT3G07310
	AT2G07676									AT5G62890
	AT3G56110									AT1G14270
	AT3G13062									AT3G10060
[truncated: 1,091 more rows]
